# Supplementary material for: Chitosan modulates Pochonia chlamydosporia gene expression during nematode egg parasitism
Source: PubMed Central journal article supplement (PMC8518118; doi:10.1111/1462-2920.15408), 2021-02-05

**Cluster 1**  
**GO:0000796**

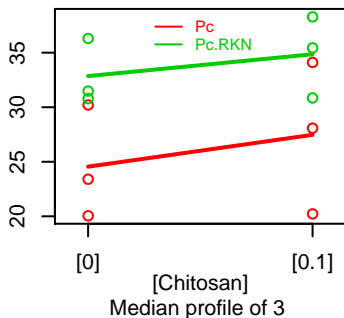

**GO:0000225**

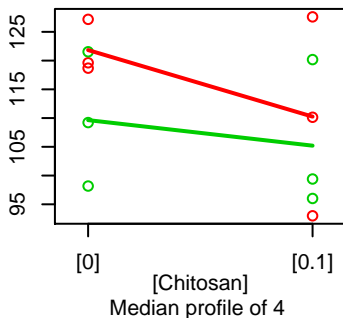

**GO:0000315**

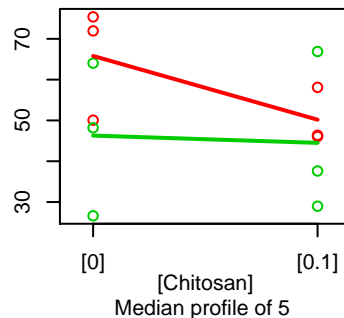

**GO:0000796**

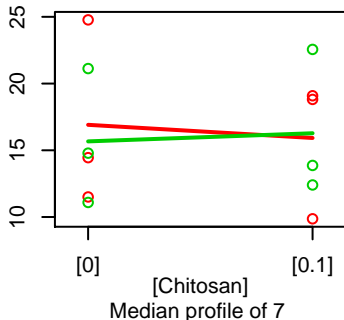

**GO:0000916**

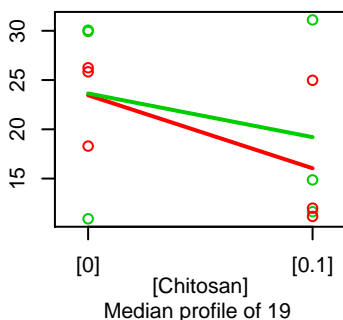

**GO:0000917**

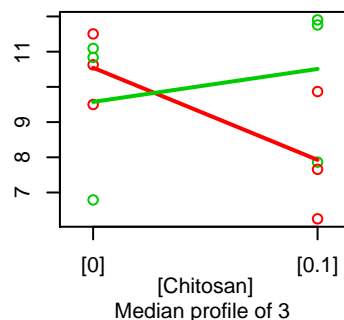

**GO:0002161**

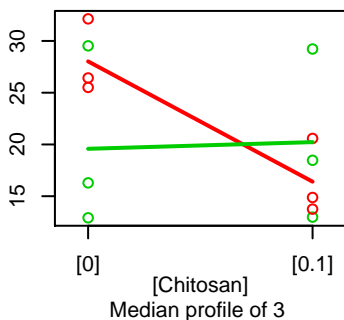

**GO:0003777**

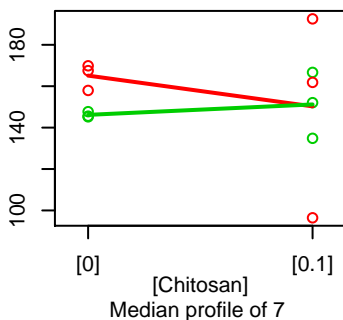

**GO:0003954**

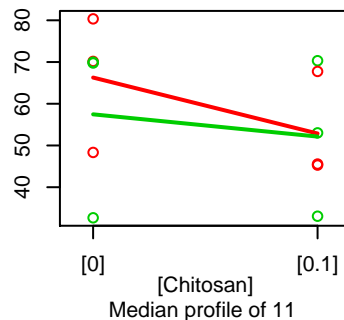

**GO:0003993**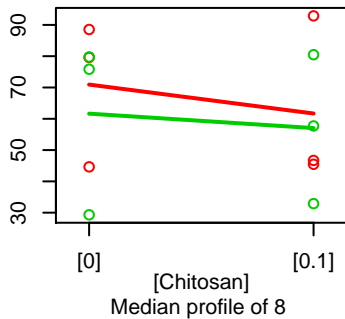**GO:0004181**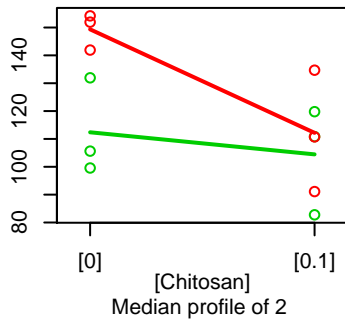**GO:0004364**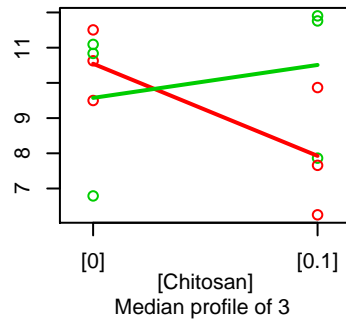**GO:0004609**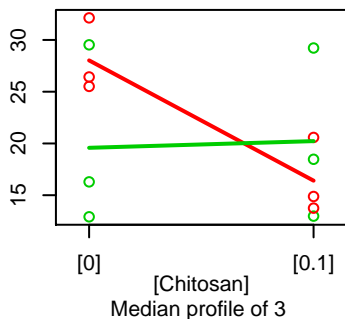**GO:0004767**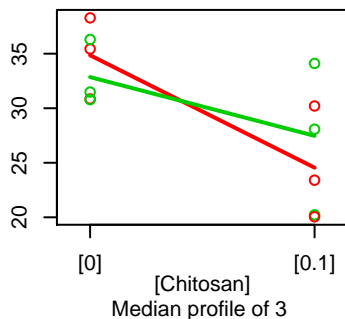**GO:0004822**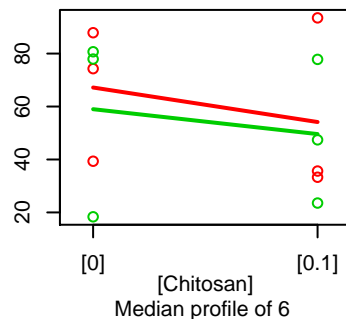**GO:0004829**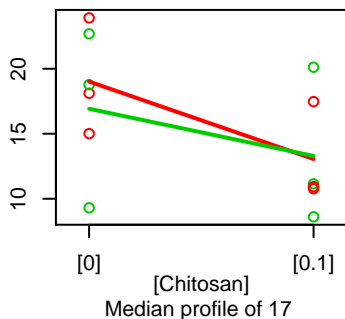**GO:0005199**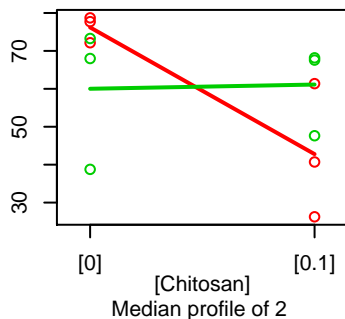**GO:0005200**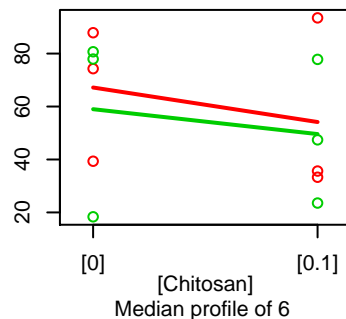

**GO:0005375**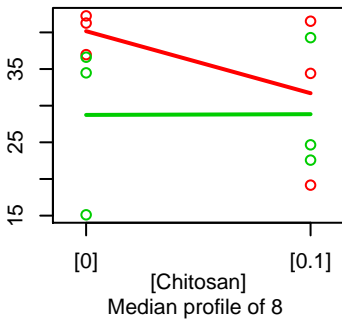**GO:0005385**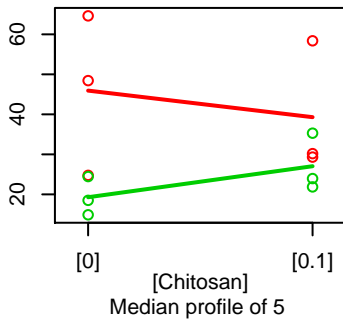**GO:0005762**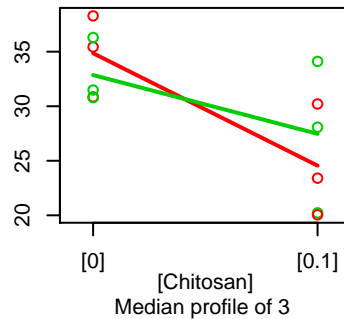**GO:0005933**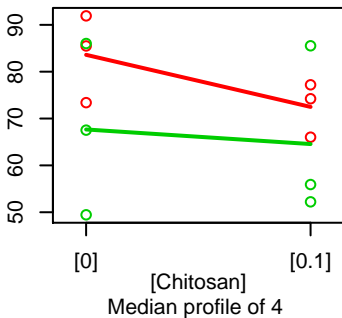**GO:0005935**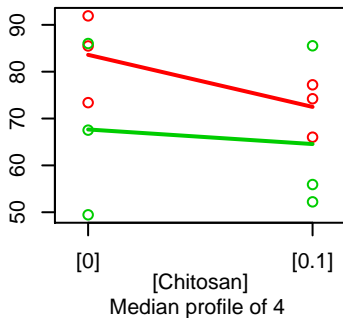**GO:0005952**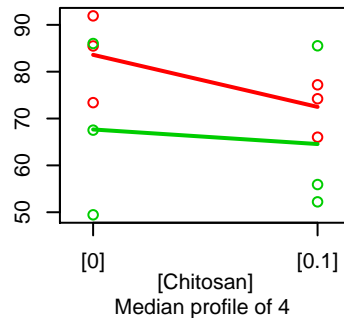**GO:0006098**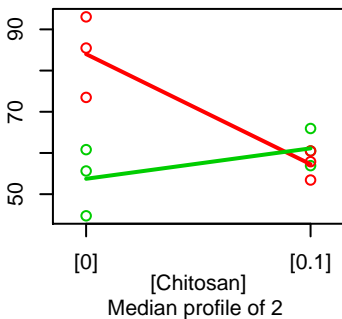**GO:0006099**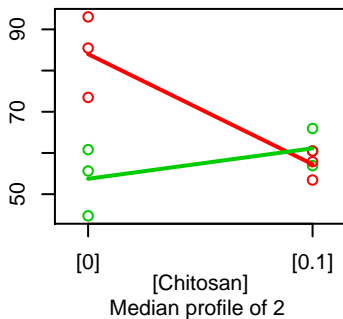**GO:0006428**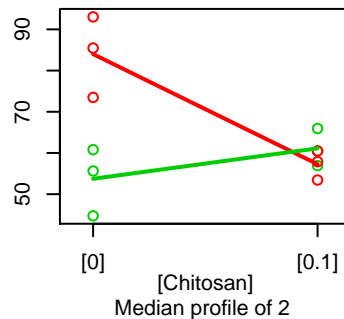

**GO:0006435**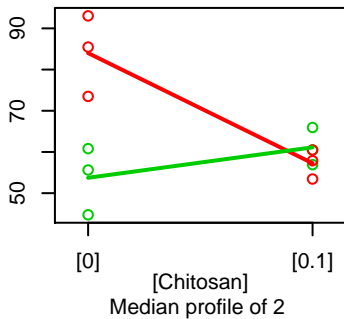**GO:0006480**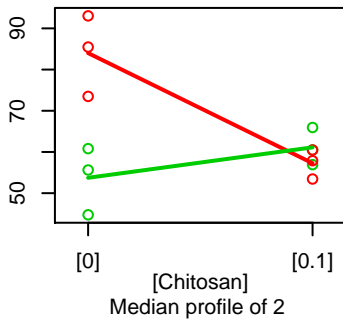**GO:0006490**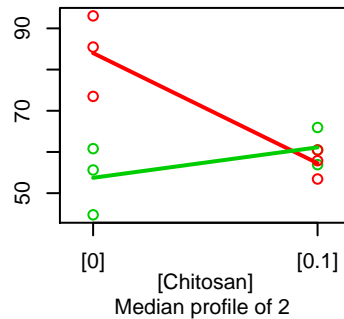**GO:0006549**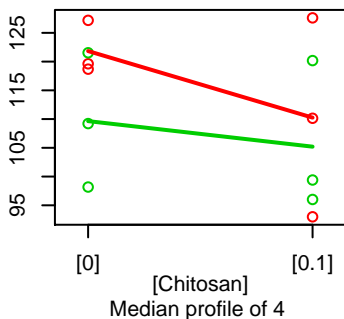**GO:0006684**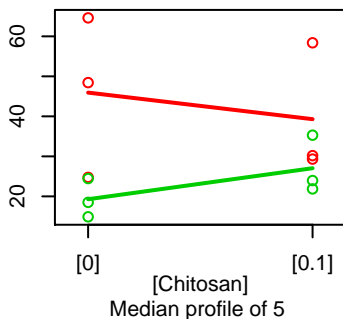**GO:0006685**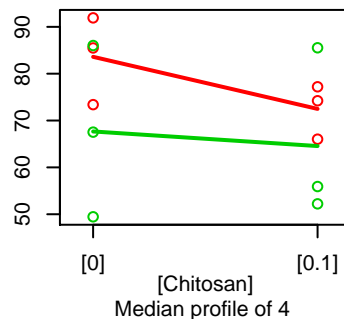**GO:0006740**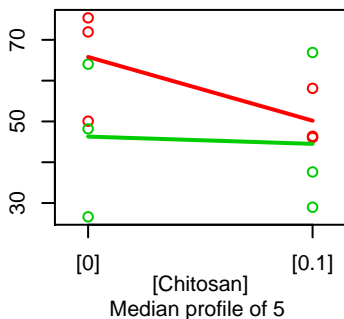**GO:0006743**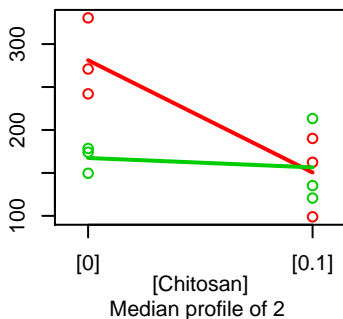**GO:0006744**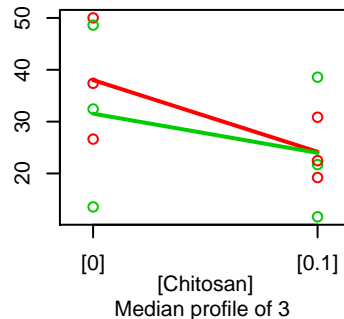

**GO:0006825**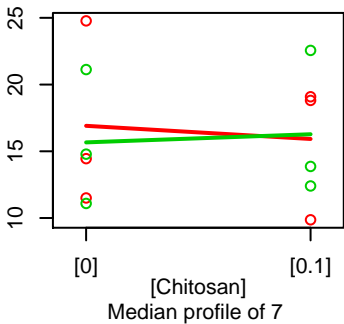**GO:0006829**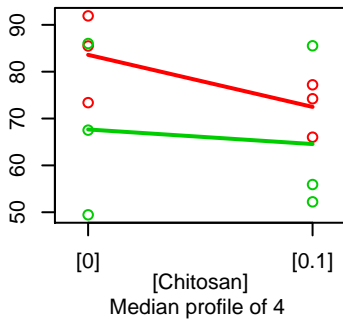**Cluster 2  
GO:0000104**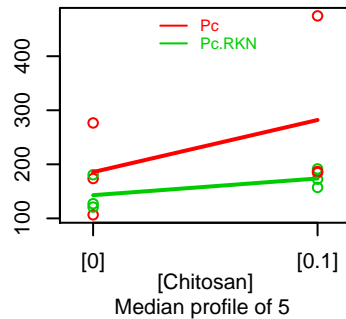**GO:0000225**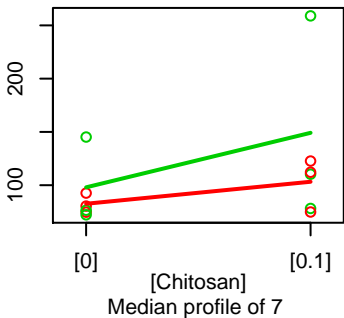**GO:0000315**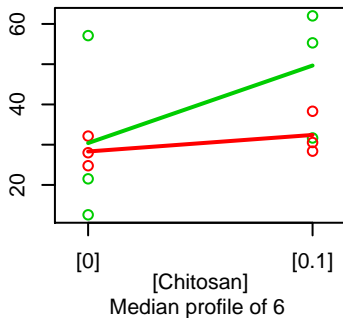**GO:0000796**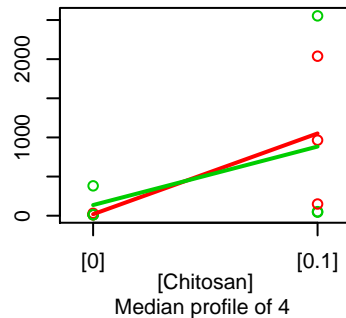**GO:0000916**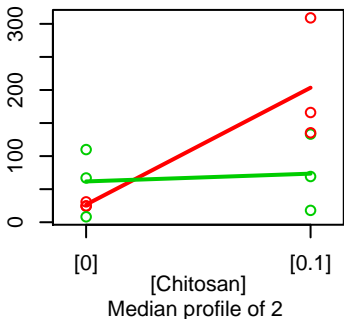**GO:0000917**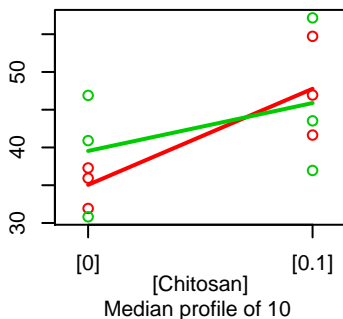**GO:0002161**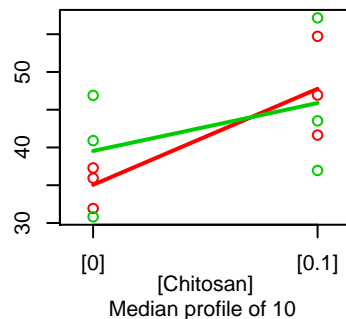

**GO:0003777**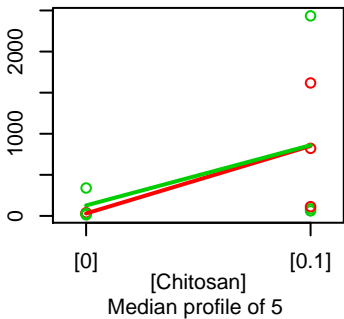**GO:0003954**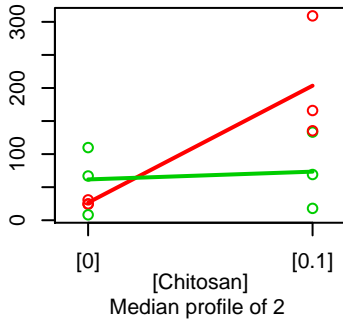**GO:0003993**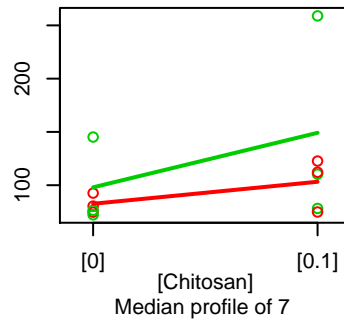**GO:0004181**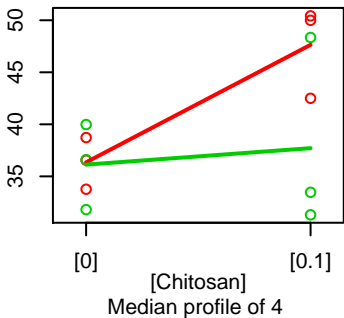**GO:0004364**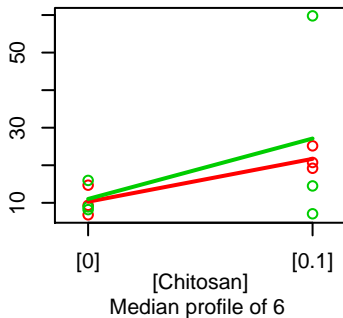**GO:0004609**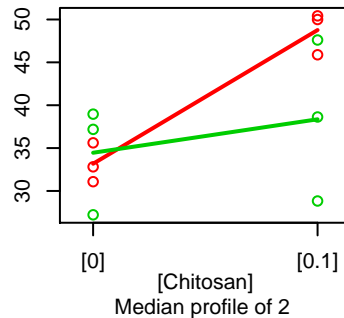**GO:0004767**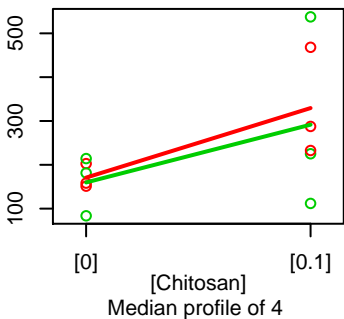**GO:0004822**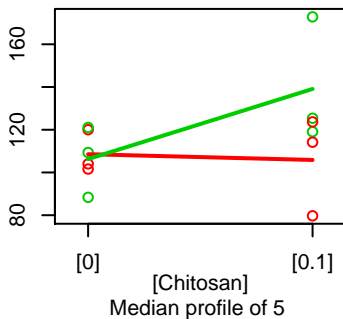**GO:0004829**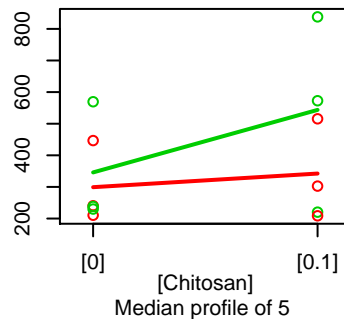

**GO:0005199**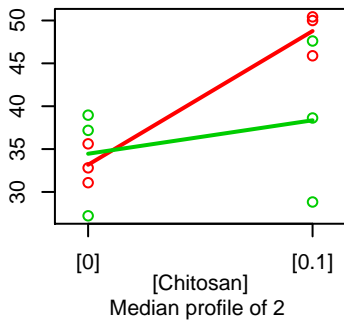**GO:0005200**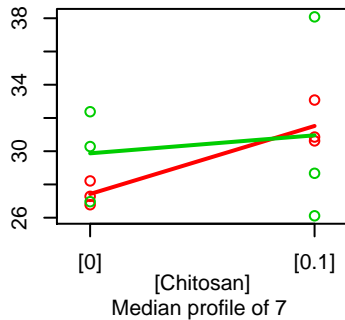**GO:0005375**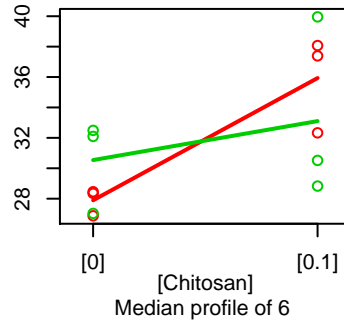**GO:0005385**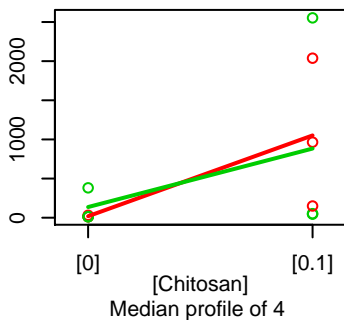**GO:0005762**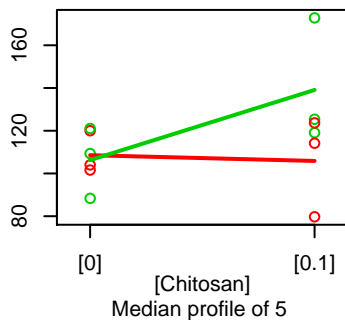**GO:0005933**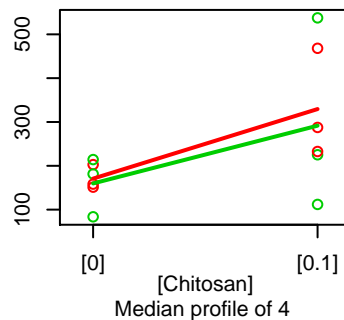**GO:0005935**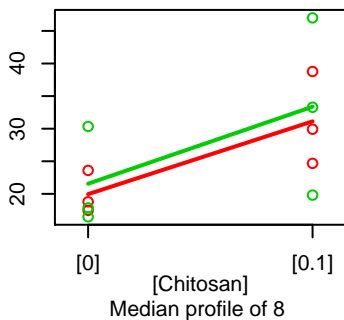**GO:0005952**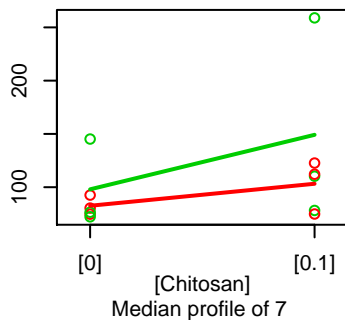**GO:0006098**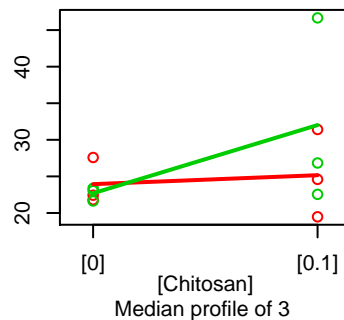

**GO:0006099**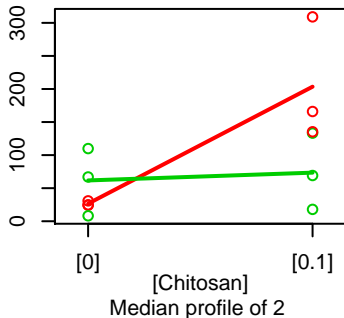**GO:0006428**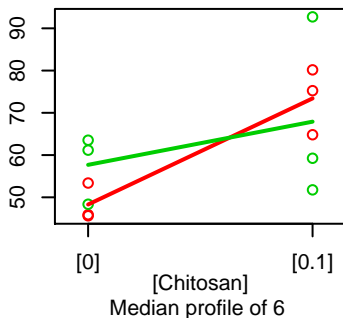**GO:0006435**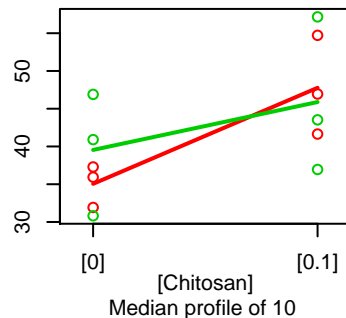**GO:0006480**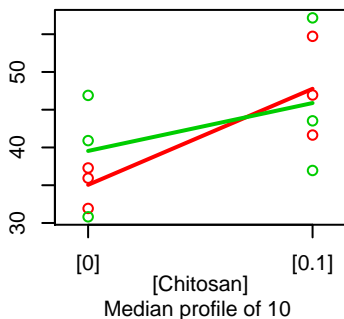**Cluster 3  
GO:0000225**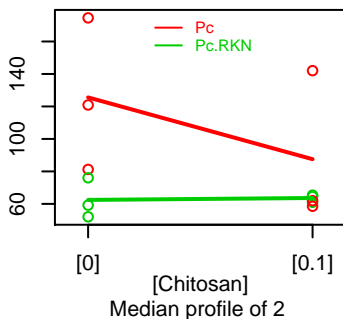**GO:0000225**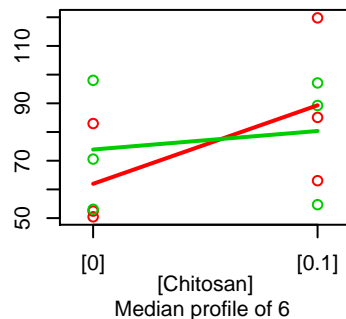**GO:0000315**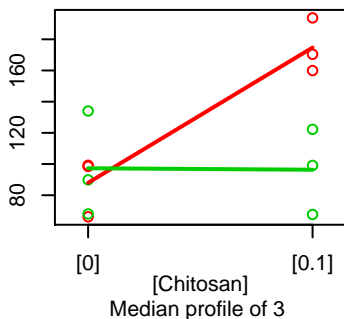**GO:0000796**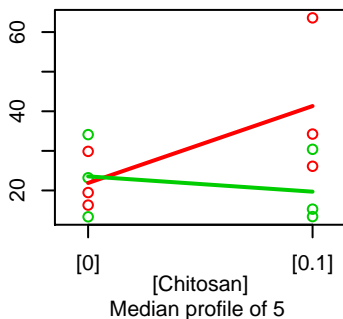**GO:0000916**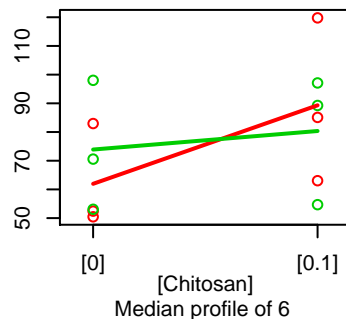



**GO:0000917**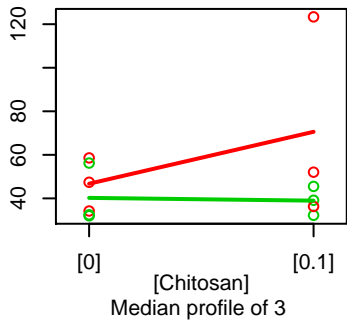**GO:0002161**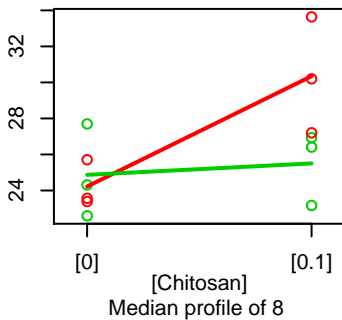**GO:0003777**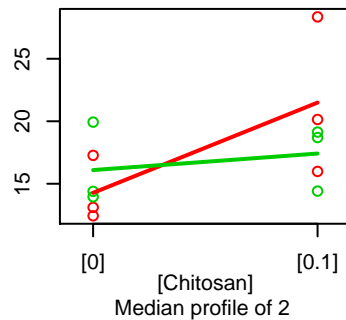**GO:0003954**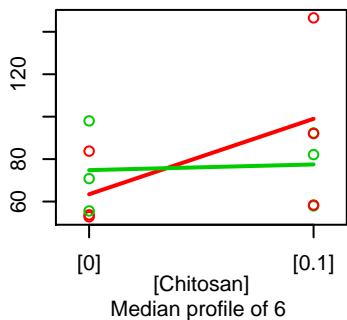**GO:0003993**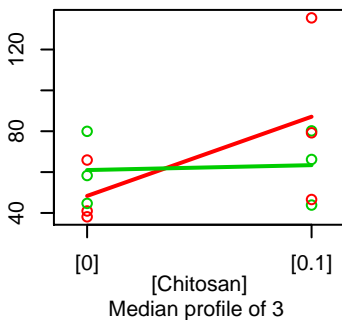**GO:0004181**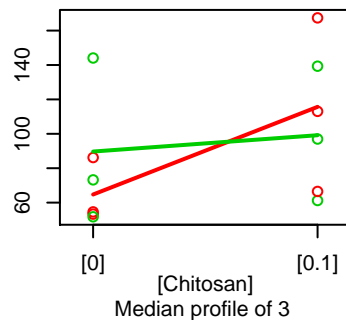**GO:0004364**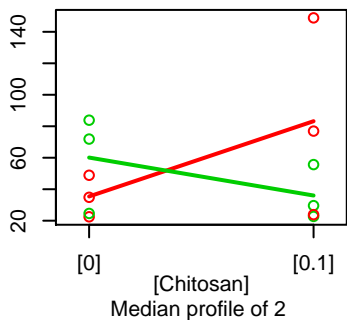**GO:0004609**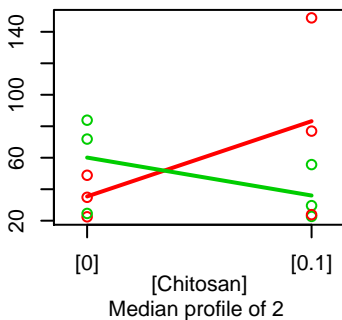**GO:0004767**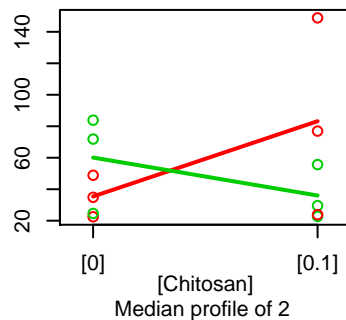

**GO:0004822**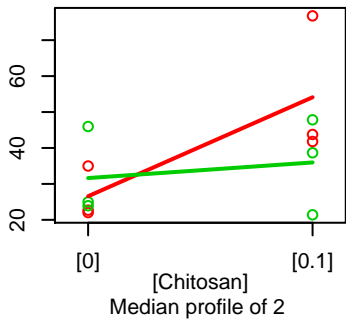**GO:0004829**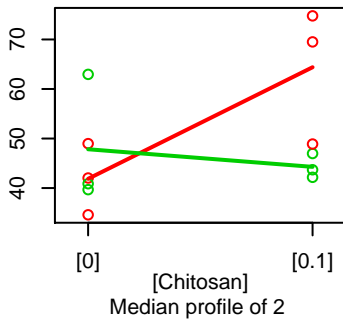**GO:0005199**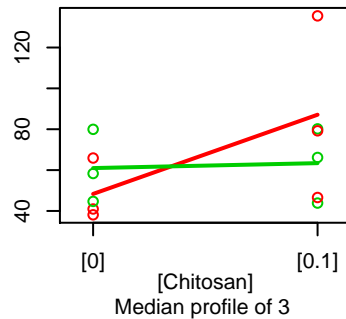**GO:0005200**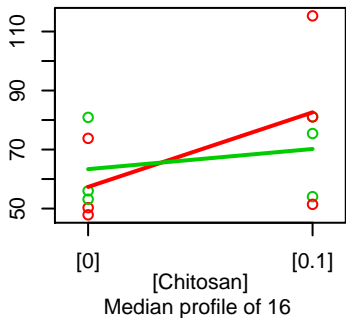**GO:0005375**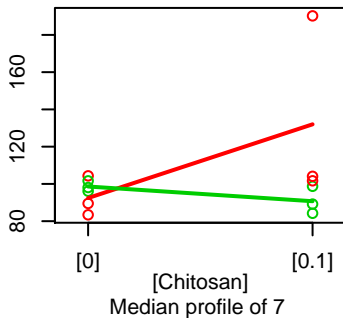**GO:0005385**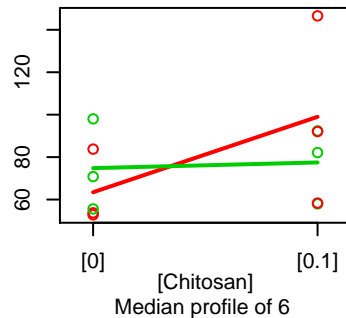**GO:0005762**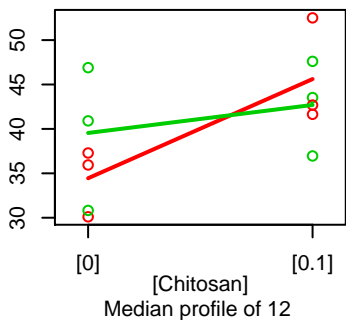**GO:0005933**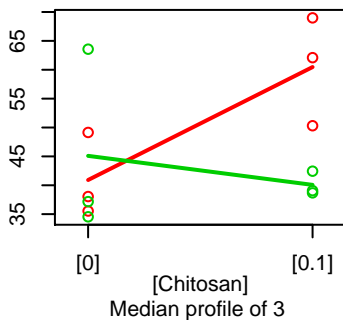**GO:0005935**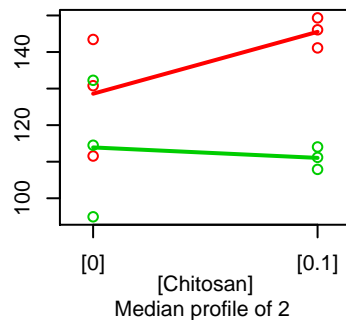

**GO:0005952**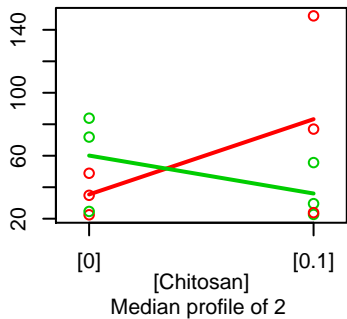**GO:0006098**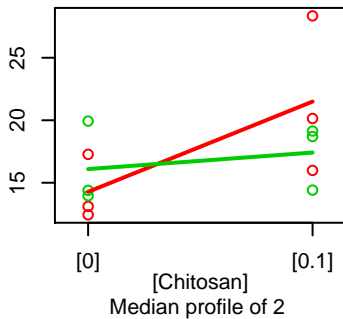**Cluster 4  
GO:0004767**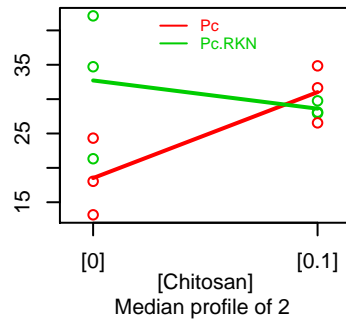**GO:0000225**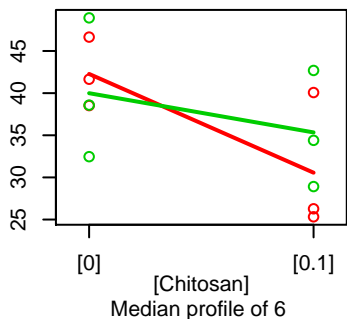**GO:0000315**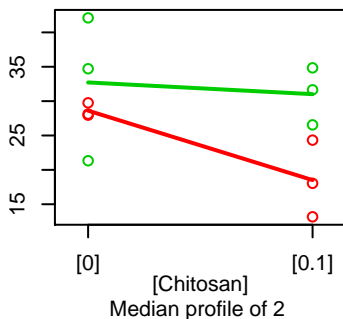**GO:0000796**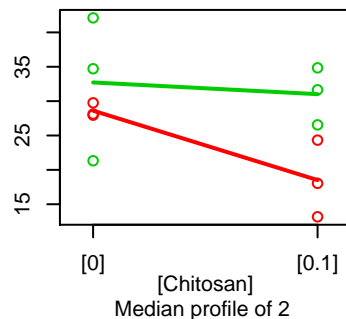**GO:0000916**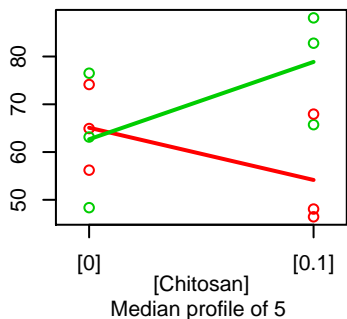**GO:0000917**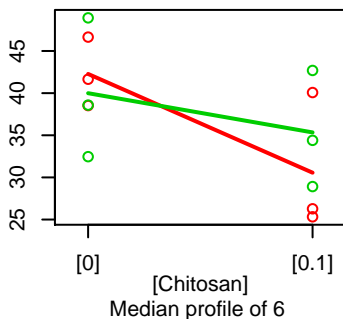**GO:0002161**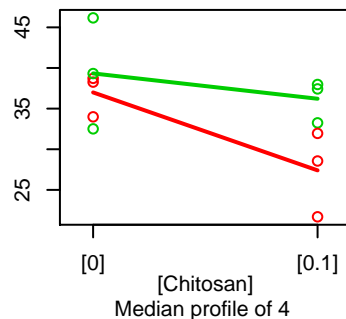

**GO:0003777**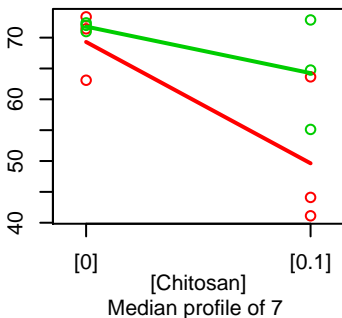**GO:0003954**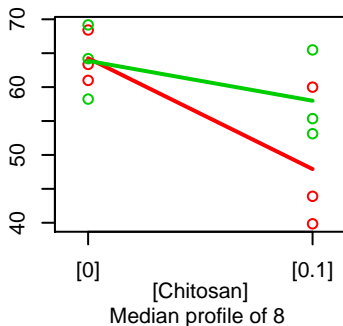**GO:0003993**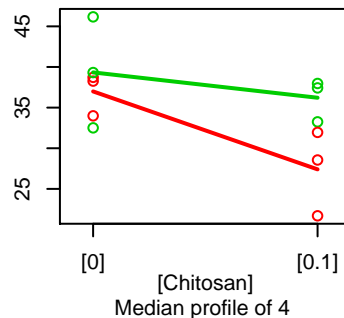**Cluster 5  
GO:0006099**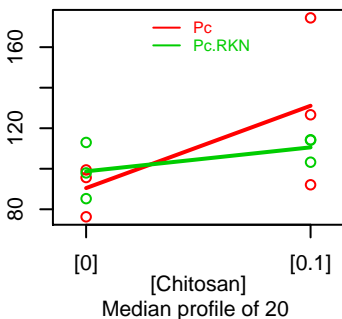**GO:0000225**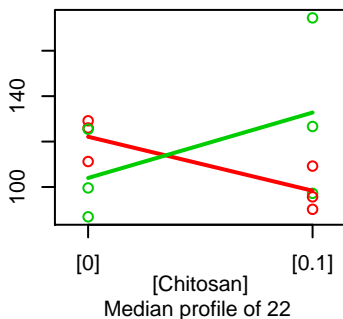**GO:0000315**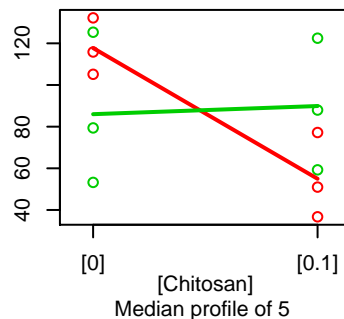**GO:0000796**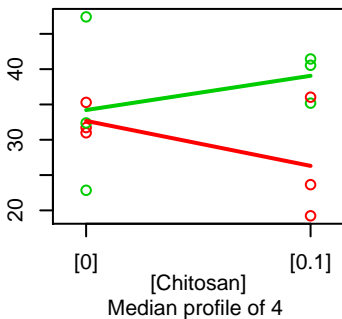**GO:0000916**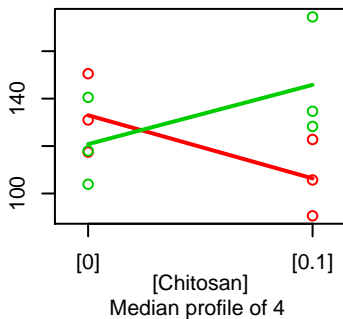**Cluster 6  
GO:0016977**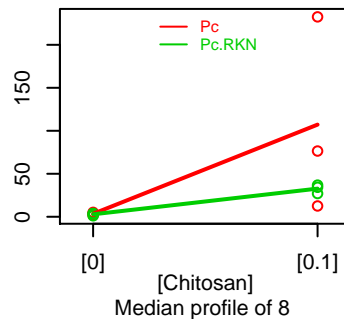

**Cluster 7**  
GO:0006098

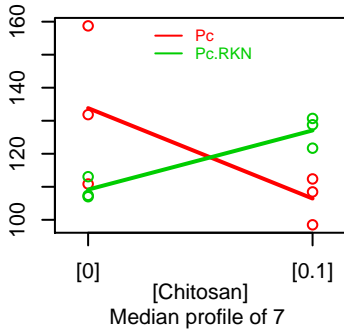

**Cluster 8**  
GO:0004181

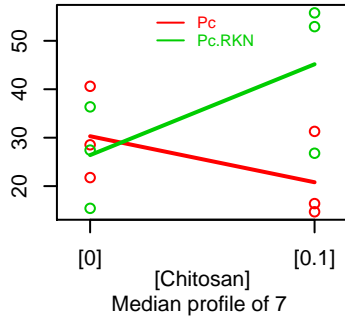

**Cluster 9**  
GO:0005199

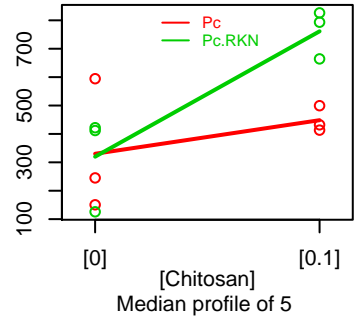

Supplement: EMI-23-4980-s003.pdf [file EMI-23-4980-s003.pdf]
