# Supplementary material for: Chitosan modulates Pochonia chlamydosporia gene expression during nematode egg parasitism
Source: PubMed Central journal article supplement (PMC8518118; doi:10.1111/1462-2920.15408), 2021-02-05

**RZR59737.1**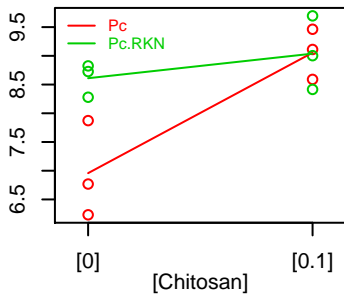**RZR66588.1**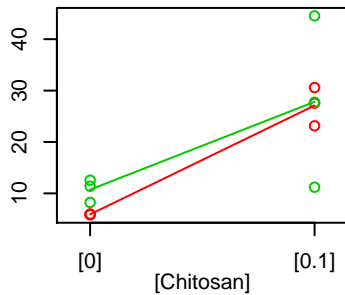**RZR66553.1**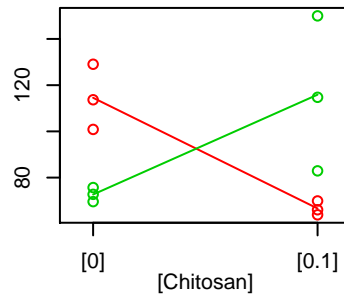**RZR65940.1**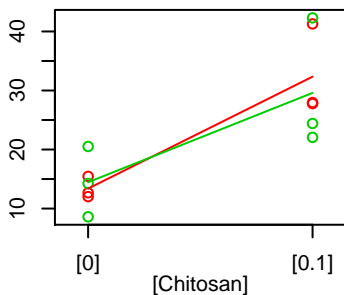**RZR61625.1**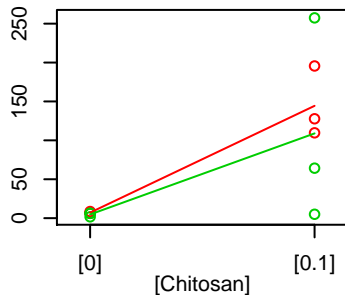**RZR61552.1**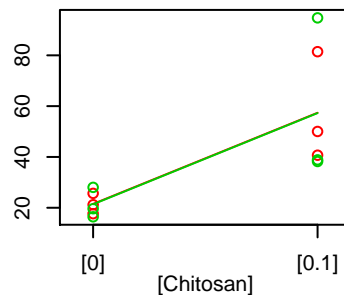**RZR70254.1**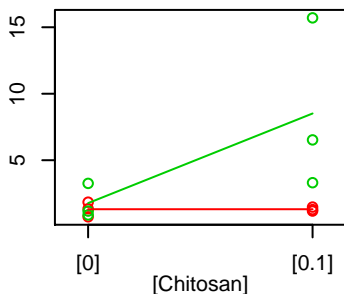**RZR70289.1**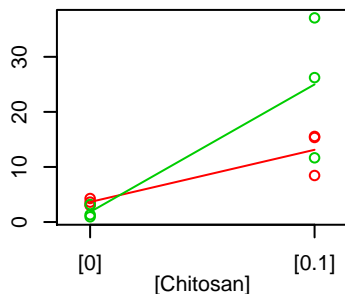**RZR64101.1**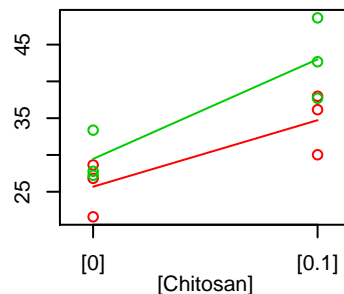

**RZR66852.1**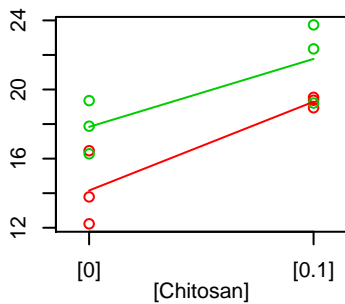**RZR65154.1**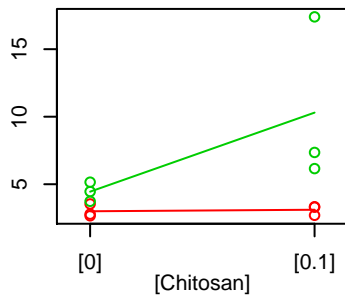**RZR64245.1**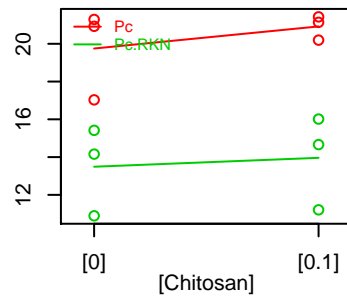**RZR68171.1**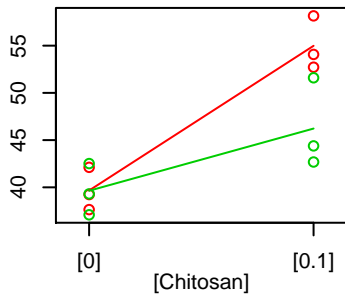**RZR61375.1**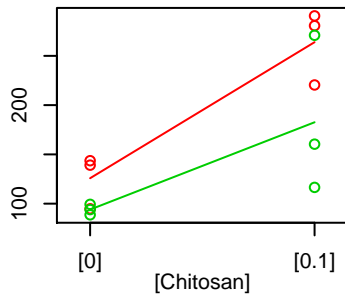**RZR67362.1**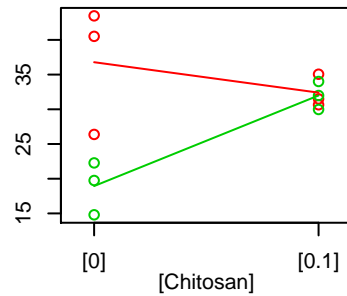**RZR69491.1**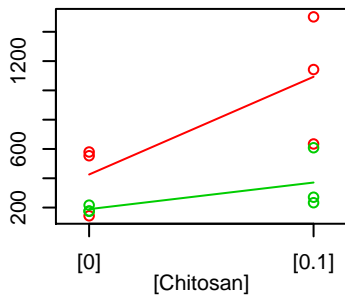**RZR68493.1**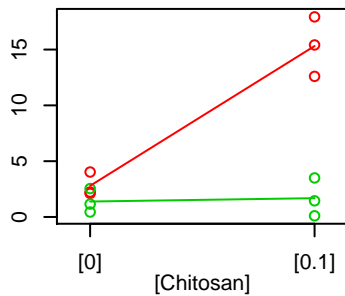**RZR60329.1**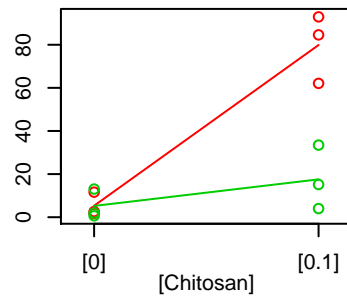

**RZR66412.1**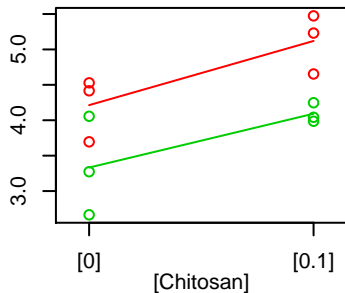**RZR62289.1**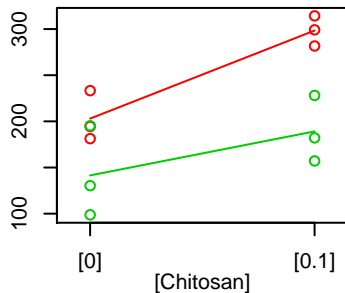**RZR66026.1**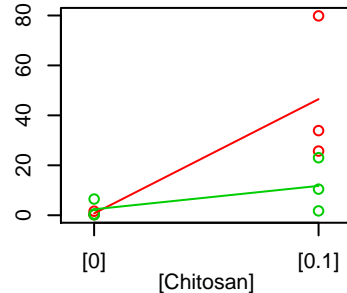**RZR68929.1**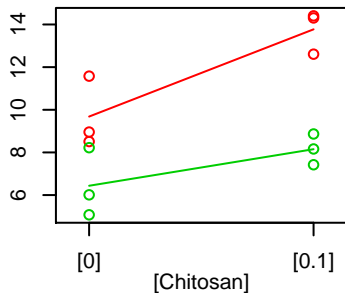**RZR59591.1**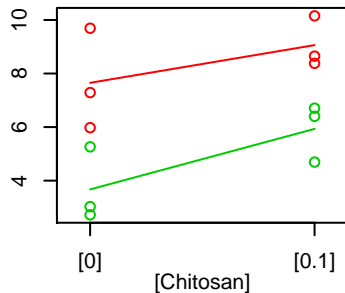**RZR69653.1**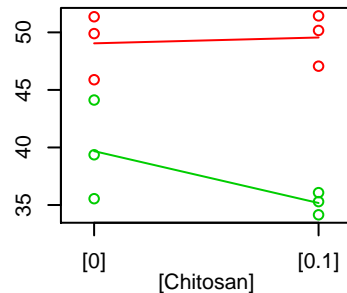**RZR63158.1**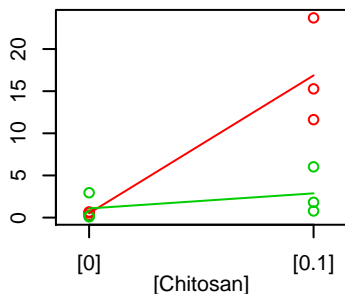**RZR63431.1**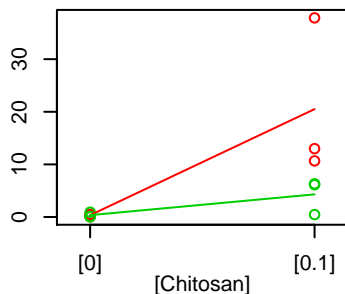**RZR64143.1**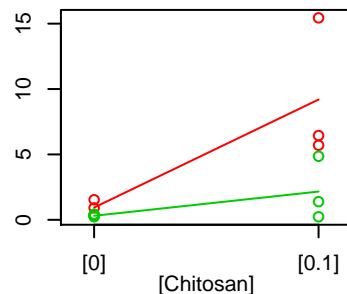

**RZR63191.1**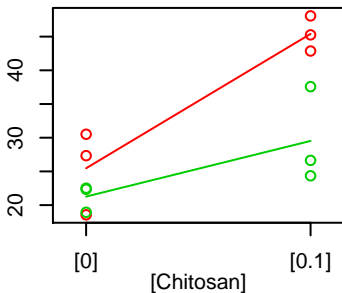**RZR63059.1**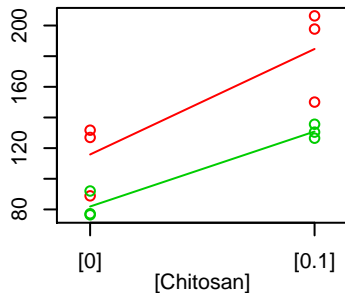**RZR61987.1**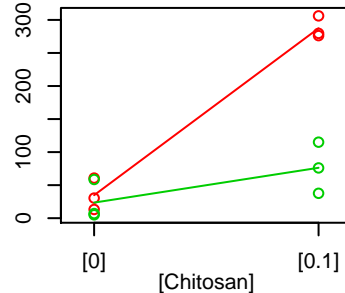**RZR62018.1**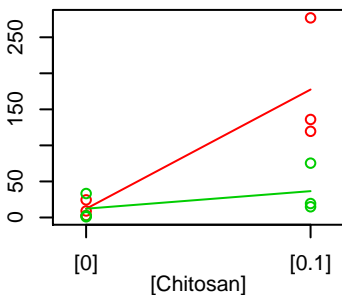**RZR62208.1**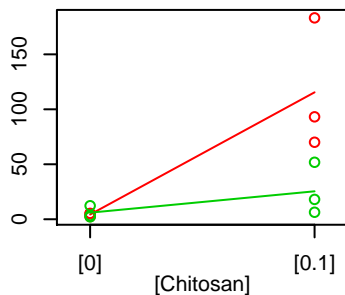**RZR62805.1**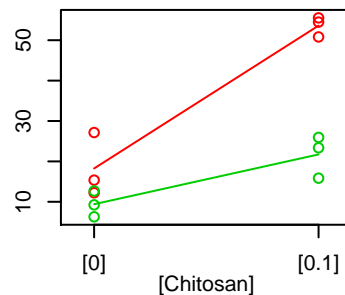**RZR69884.1**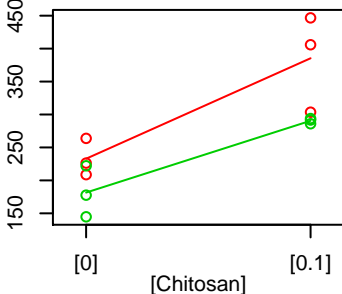**RZR65709.1**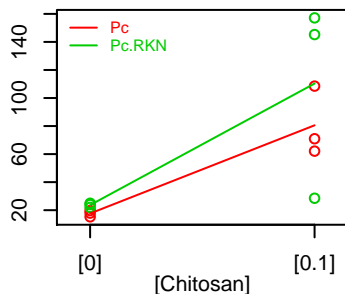**RZR66181.1**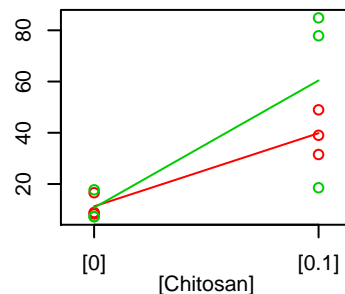

**RZR68451.1**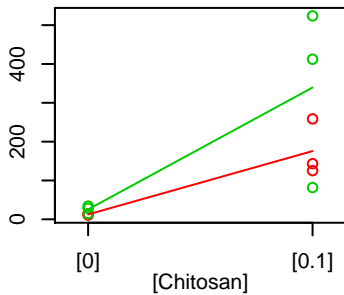**RZR70313.1**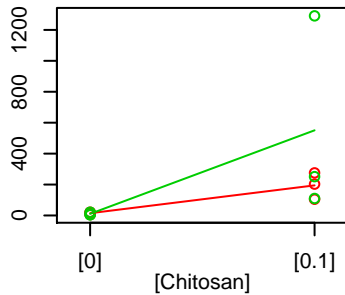**RZR63795.1**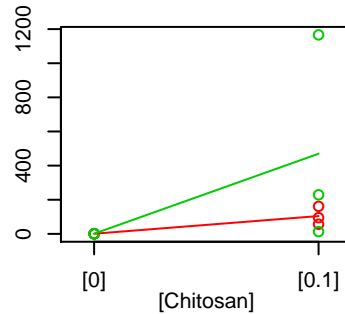**RZR64948.1**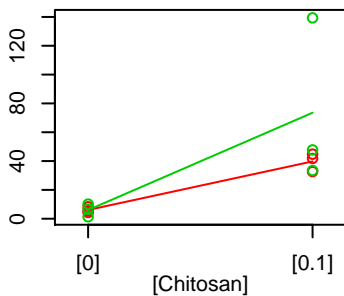**RZR61856.1**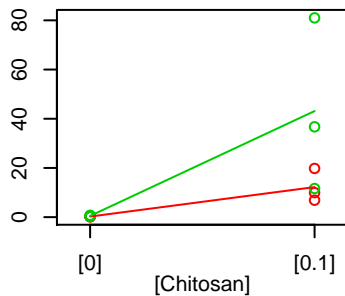**RZR61846.1**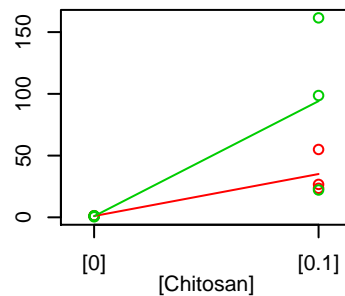**RZR61845.1**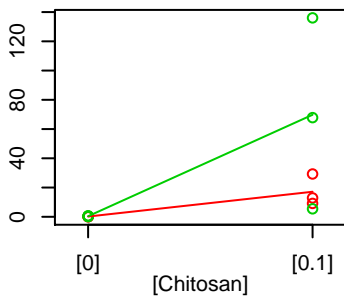**RZR62940.1**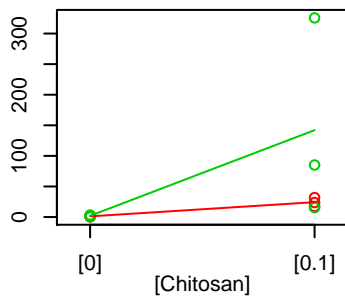**RZR63081.1**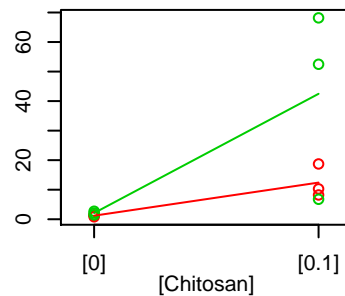

**RZR69242.1**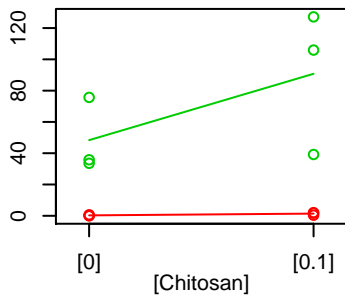**RZR64799.1**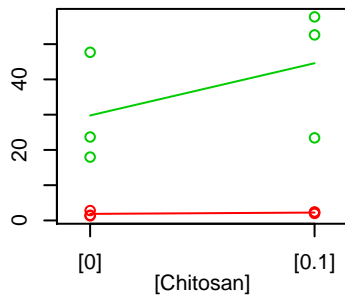**RZR68026.1**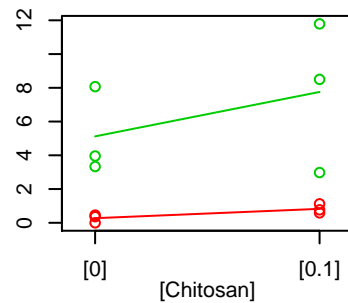**RZR61327.1**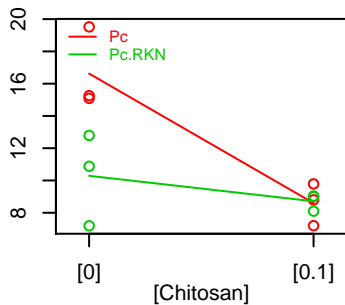**RZR60540.1**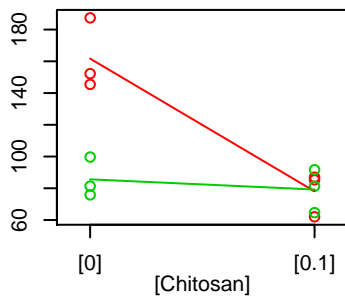**RZR65419.1**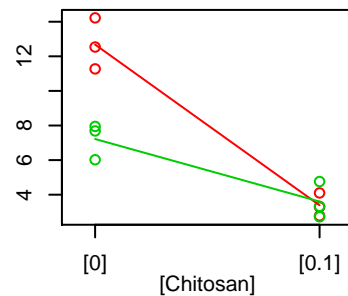**RZR65430.1**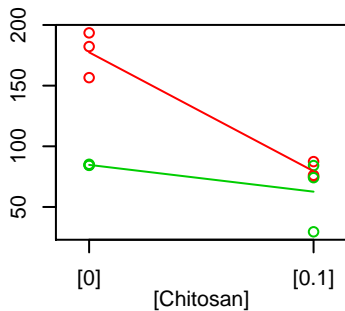**RZR65521.1**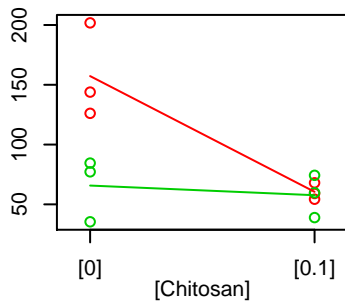**RZR69492.1**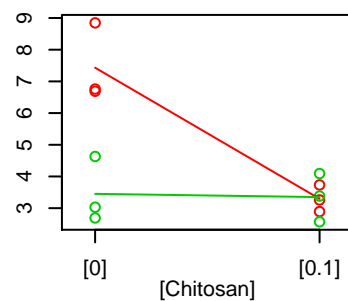

**RZR69559.1**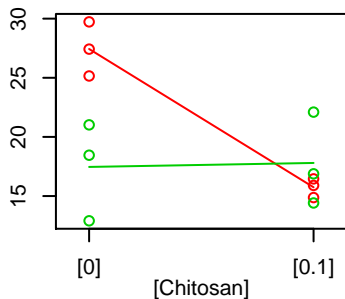**RZR66600.1**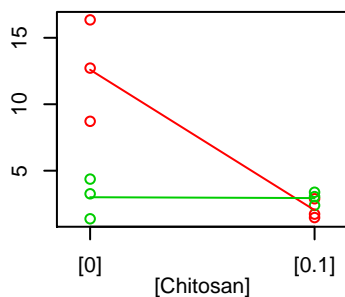**RZR62528.1**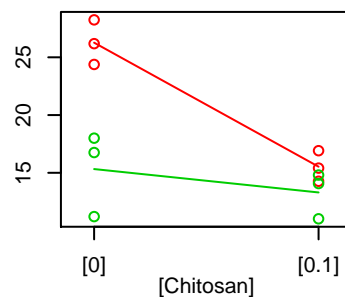**RZR65936.1**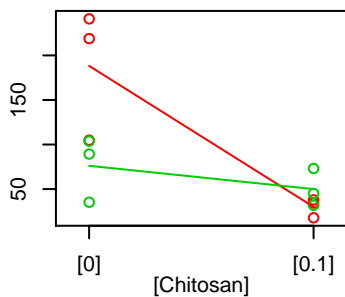**RZR66738.1**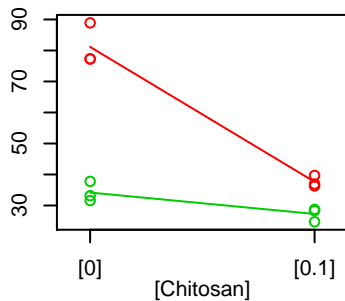**RZR59043.1**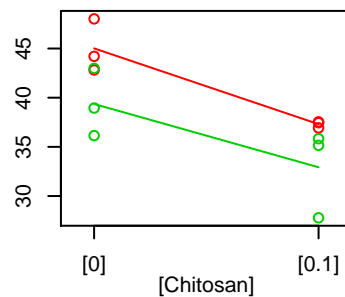**RZR61231.1**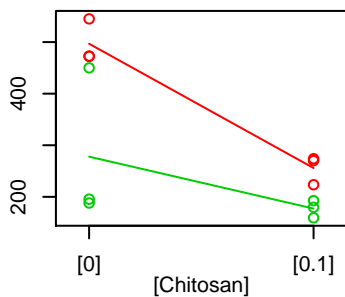**RZR64754.1**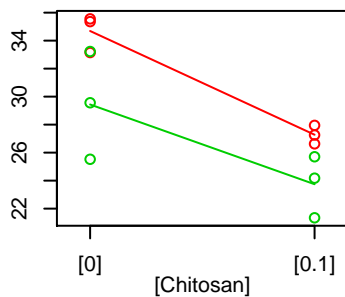**RZR61534.1**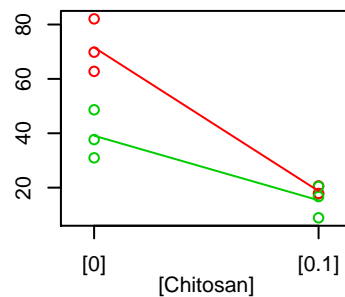

**RZR62083.1**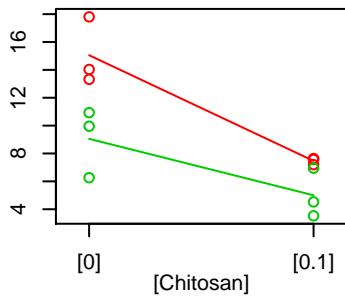**RZR69669.1**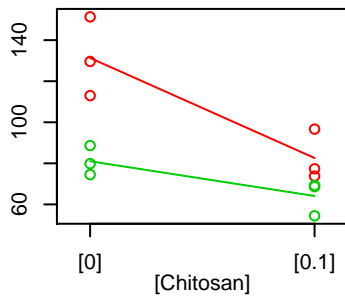**RZR60396.1**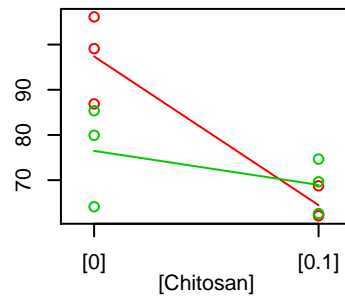**RZR68363.1**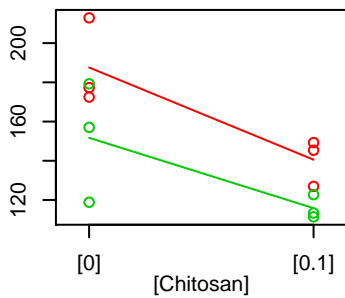**RZR67311.1**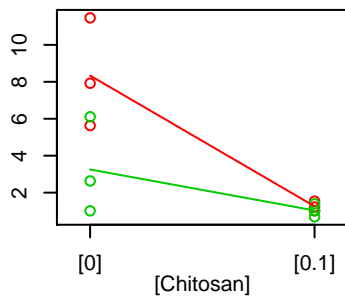**RZR63863.1**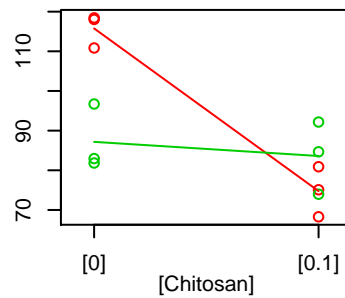**RZR63790.1**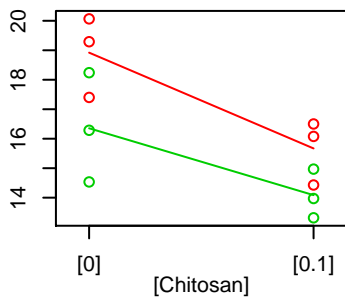**RZR64014.1**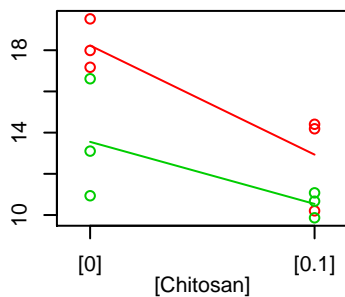**RZR62553.1**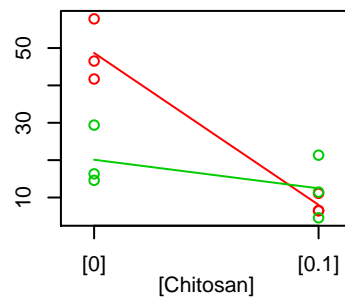



**RZR61872.1**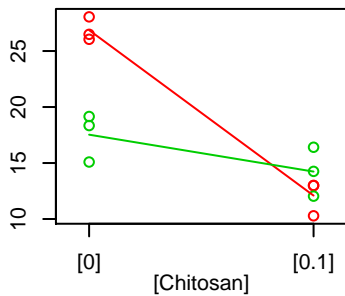**RZR61827.1**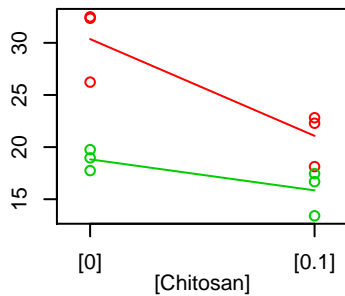**RZR69040.1**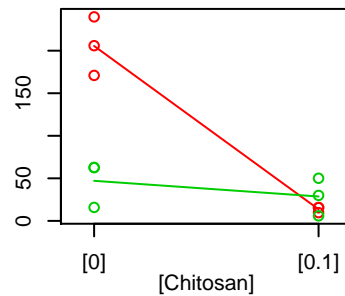**RZR69039.1**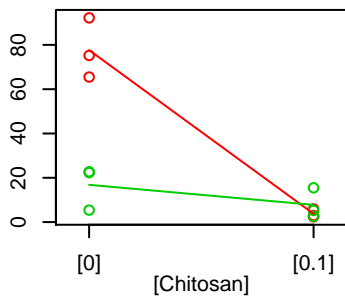**RZR64310.1**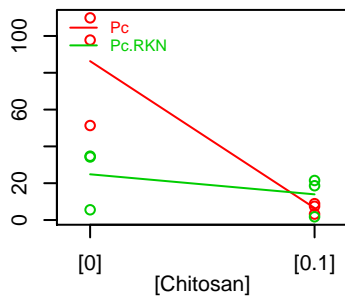**RZR67605.1**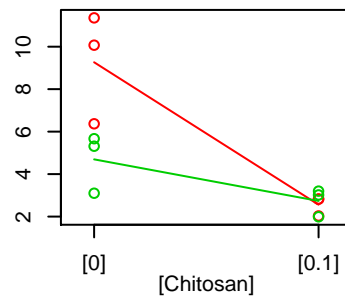**RZR59322.1**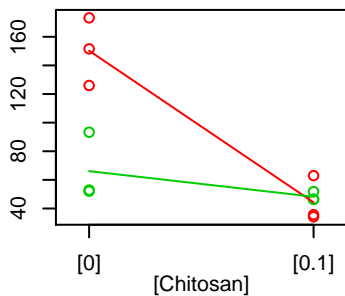**RZR65196.1**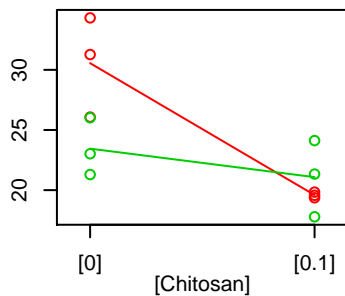**RZR61435.1**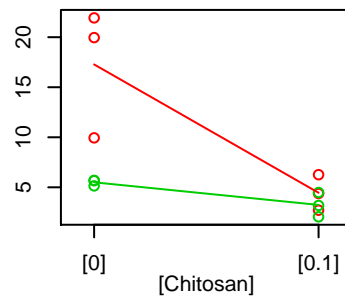

**RZR69481.1**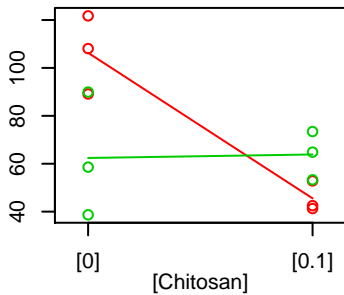**RZR68130.1**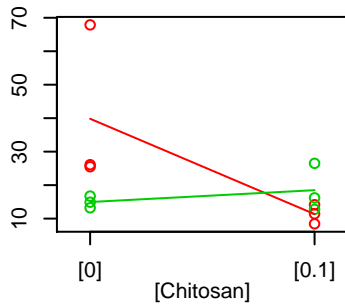**RZR66182.1**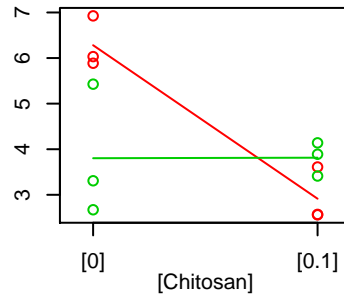**RZR62495.1**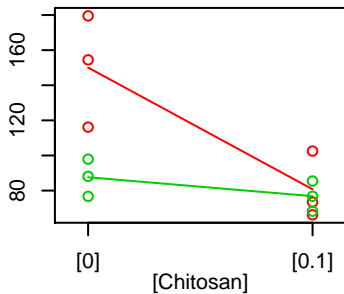**RZR65938.1**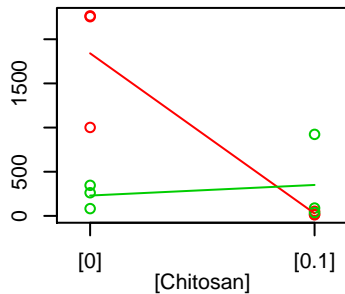**RZR69976.1**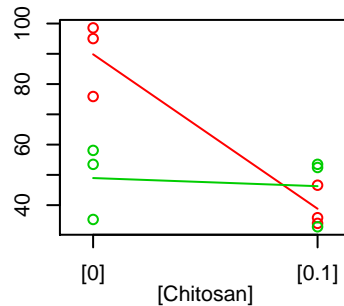**RZR59077.1**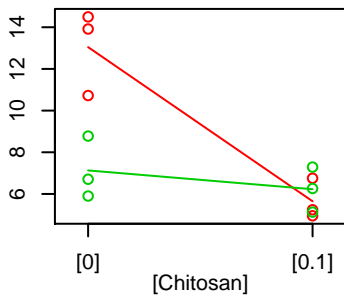**RZR60844.1**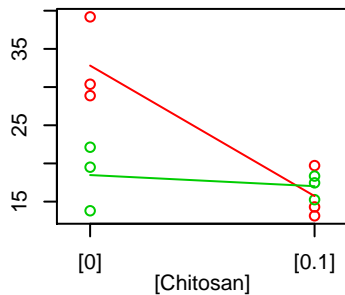**RZR63007.1**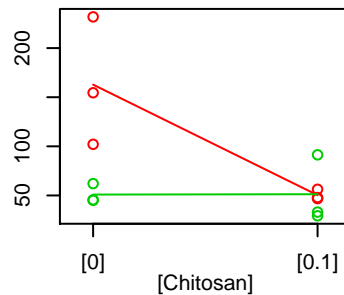

**RZR66003.1**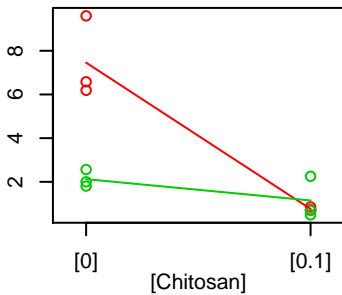**RZR64989.1**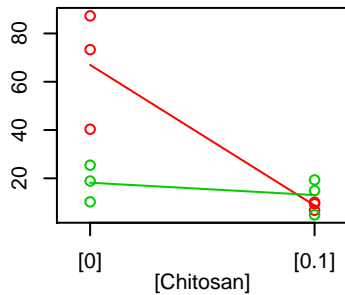**RZR65028.1**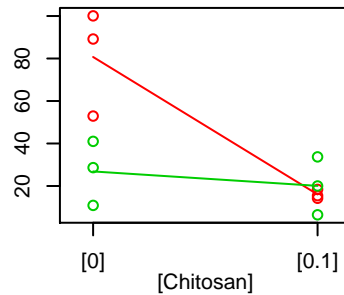**RZR70243.1**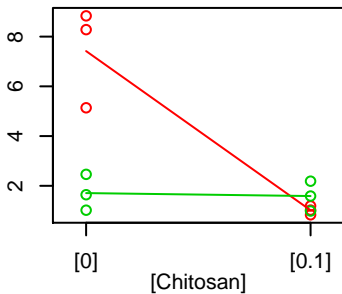**RZR61002.1**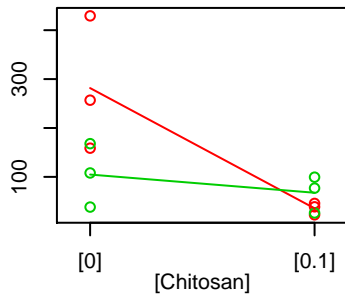**RZR60003.1**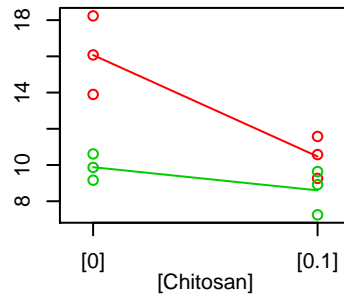**RZR67249.1**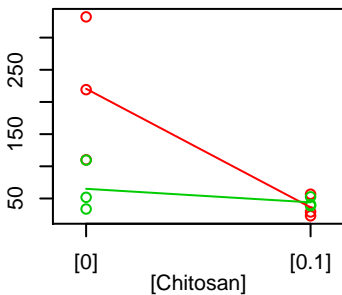**RZR64134.1**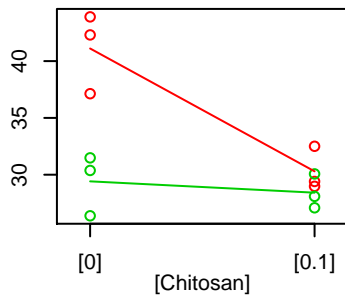**RZR62422.1**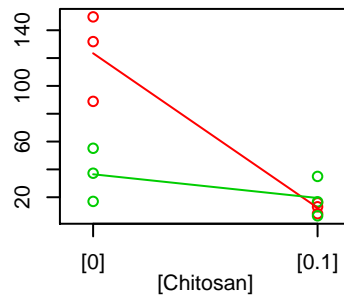

**RZR62414.1**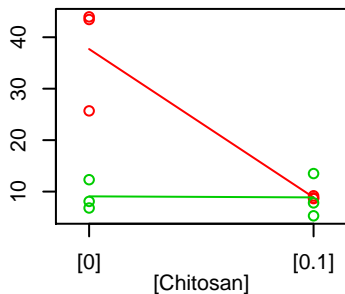**RZR63798.1**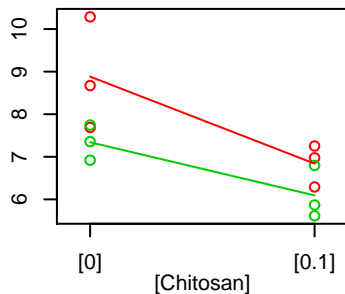**RZR61102.1**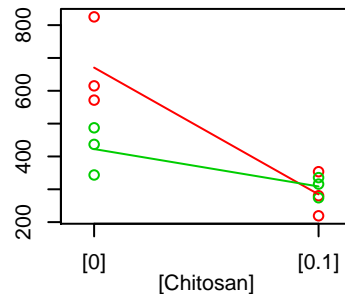**RZR63930.1**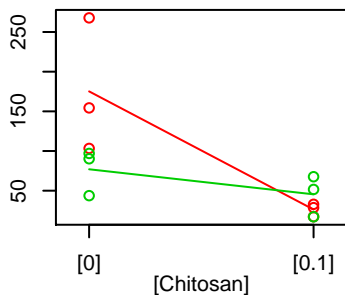**RZR67654.1**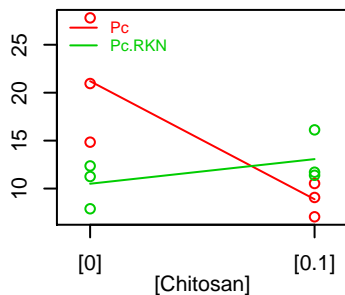**RZR59365.1**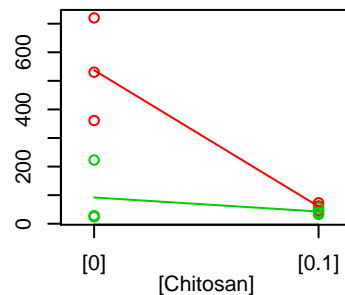**RZR70187.1**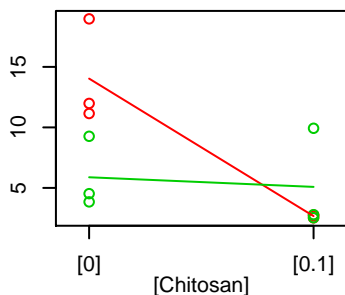**RZR65332.1**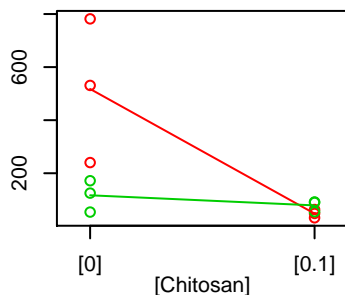**RZR65455.1**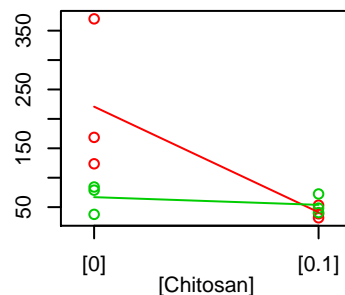

**RZR69535.1**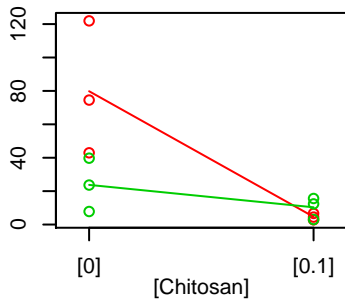**RZR60358.1**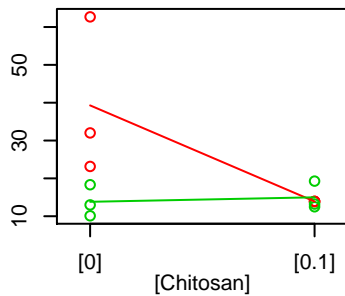**RZR60184.1**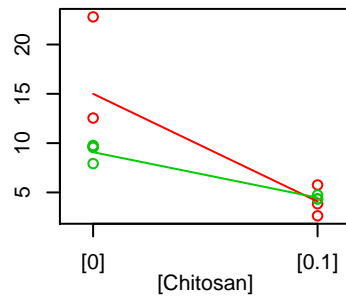**RZR66613.1**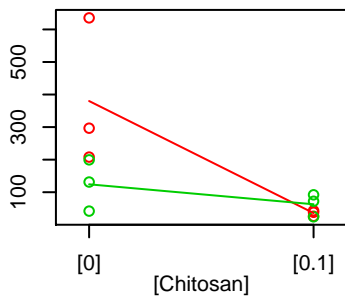**RZR66454.1**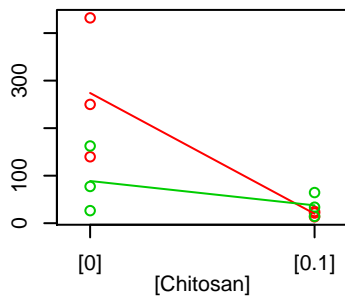**RZR62487.1**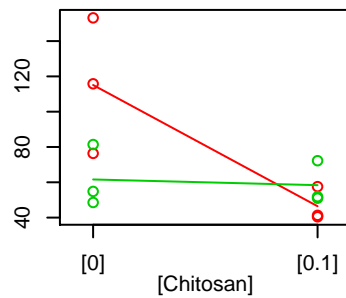**RZR66043.1**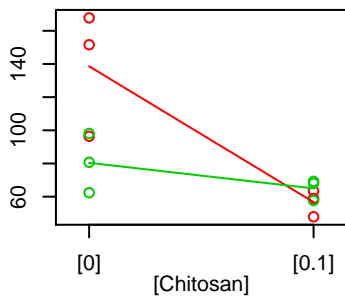**RZR69146.1**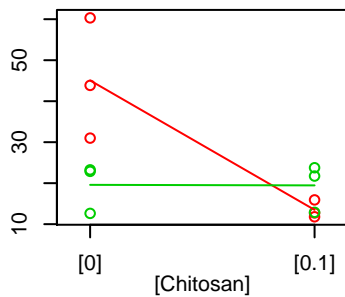**RZR62271.1**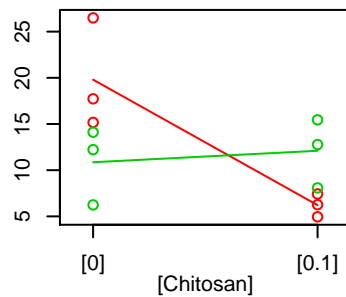

**RZR62287.1**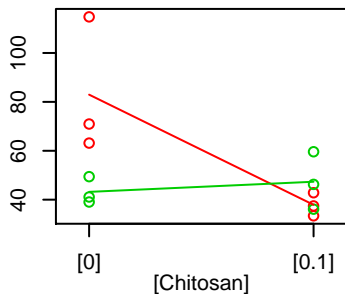**RZR65976.1**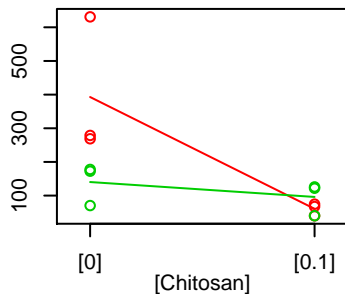**RZR61602.1**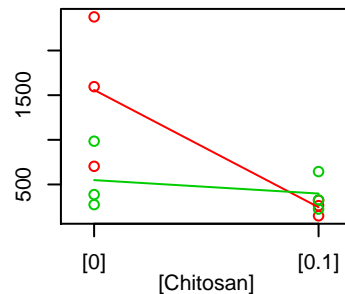**RZR65012.1**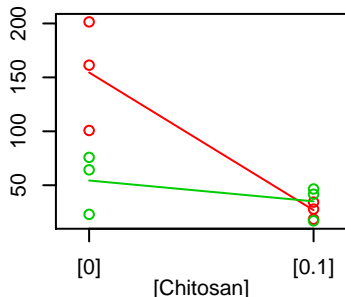**RZR65027.1**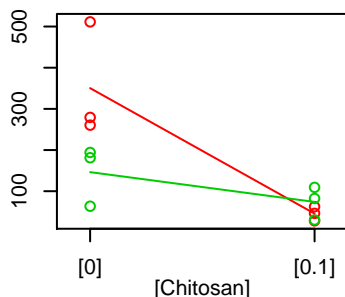**RZR64973.1**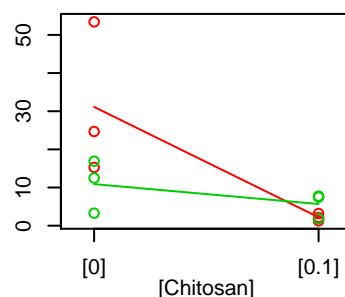**RZR65839.1**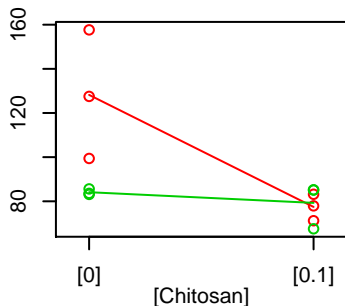**RZR70238.1**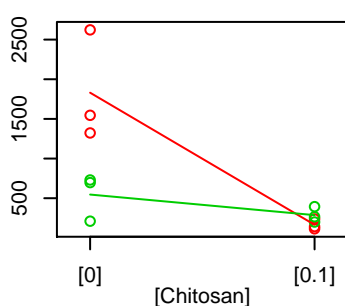**RZR61033.1**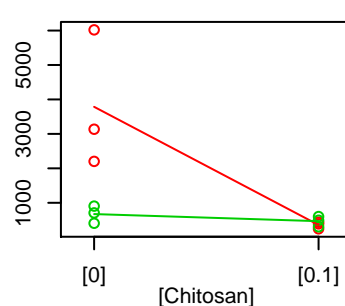

**RZR61034.1**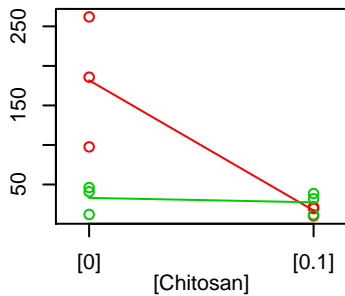**RZR61787.1**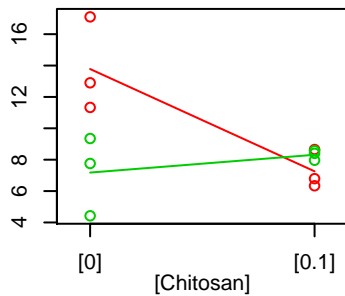**RZR67257.1**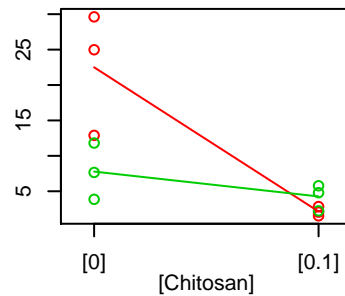**RZR67229.1**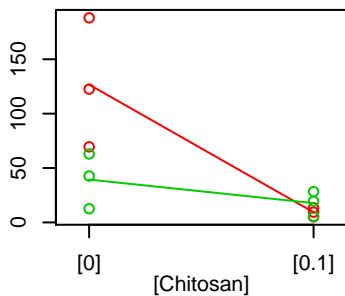**RZR67230.1**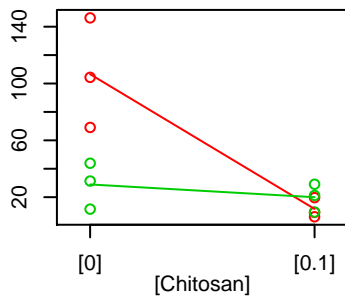**RZR62837.1**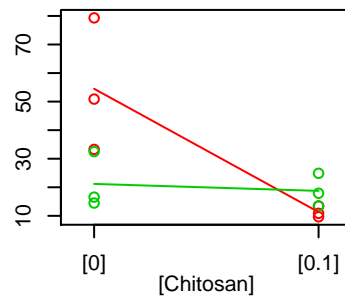**RZR63193.1**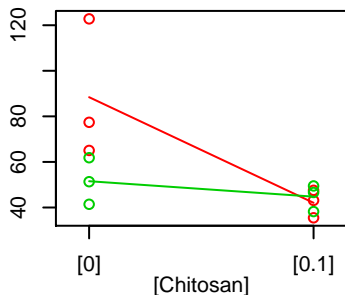**RZR64929.1**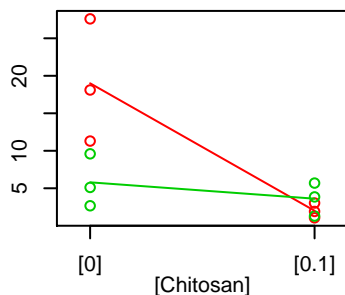**RZR59815.1**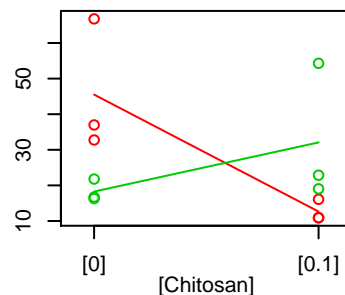

**RZR62546.1**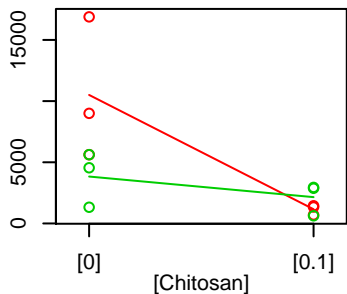**RZR62047.1**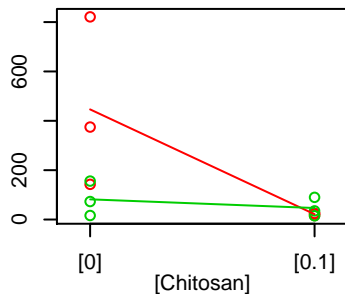**RZR62583.1**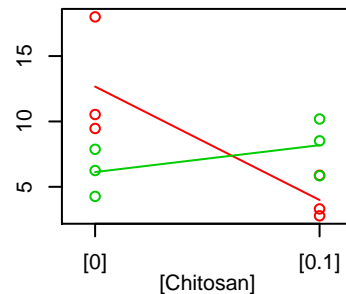**RZR63453.1**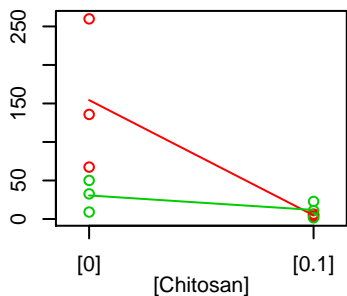**RZR68164.1**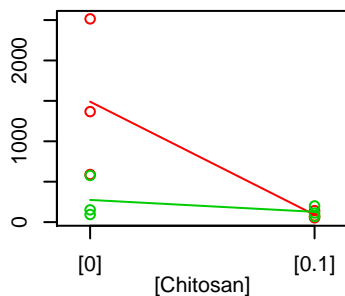**RZR66872.1**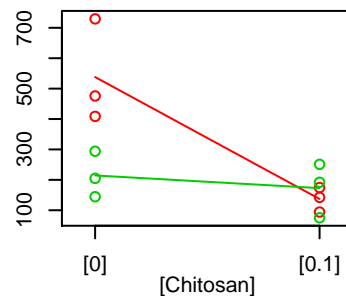**RZR61362.1**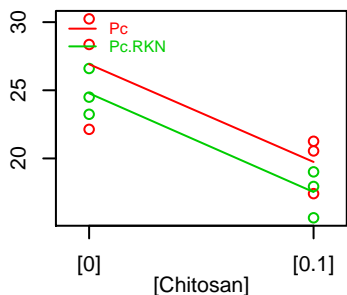**RZR66560.1**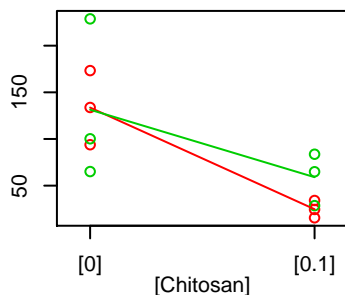**RZR65638.1**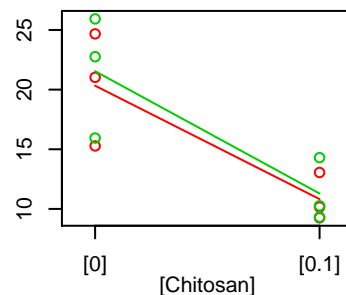



**RZR60847.1**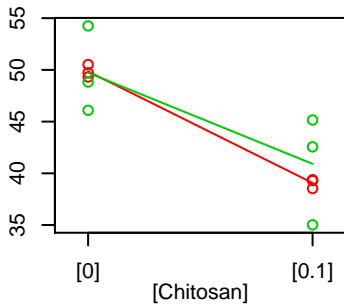**RZR62622.1**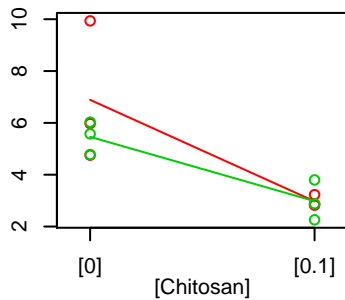**RZR63094.1**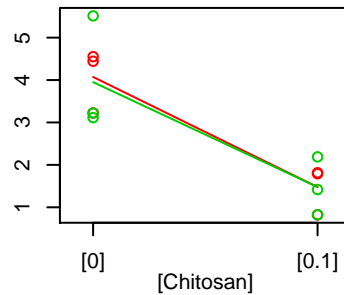**RZR63110.1**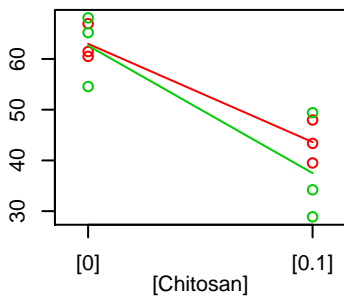**RZR66350.1**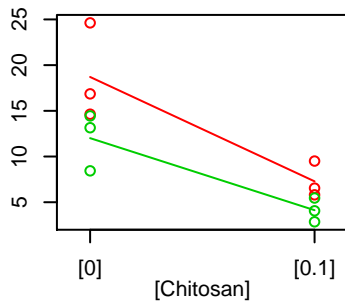**RZR64573.1**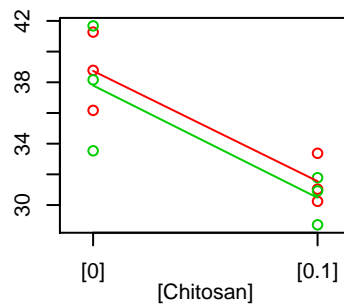**RZR67506.1**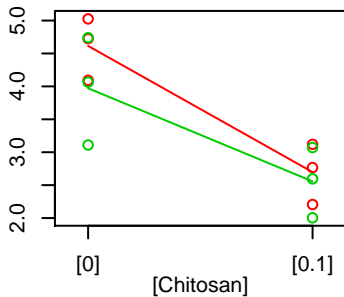**RZR68233.1**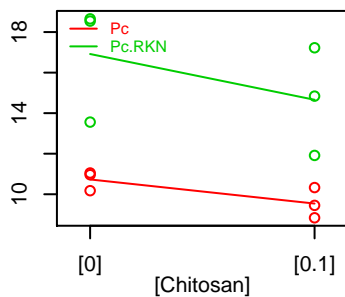**RZR68254.1**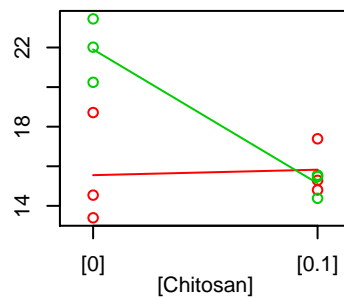

**RZR59707.1**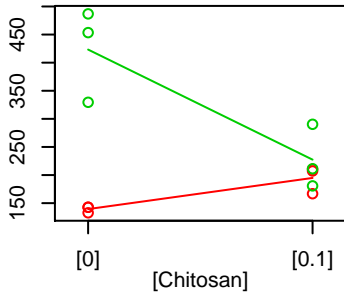**RZR59706.1**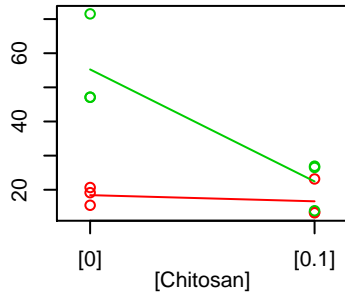**RZR64444.1**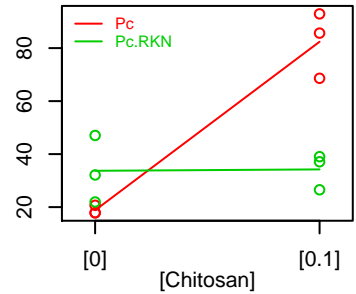**RZR60694.1**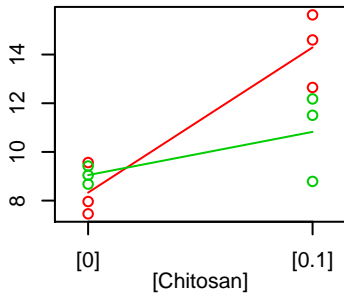**RZR67695.1**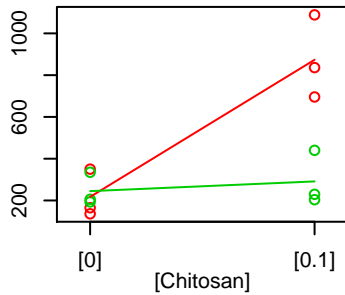**RZR68291.1**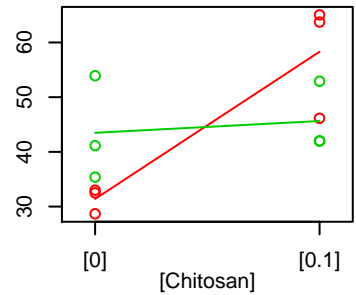**RZR65223.1**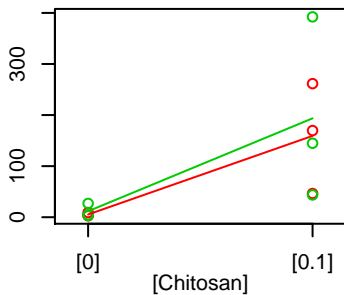**RZR61414.1**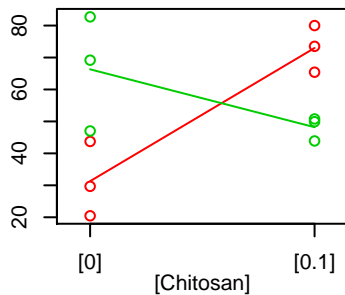**RZR59733.1**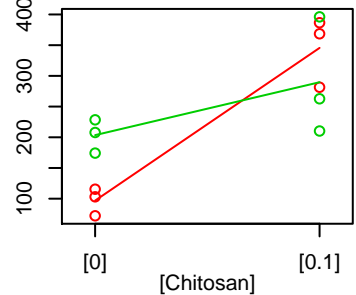

**RZR60129.1**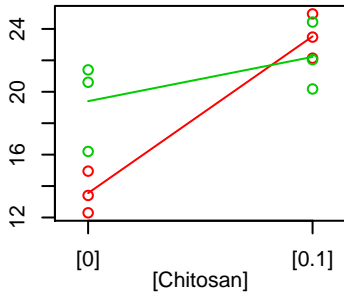**RZR66542.1**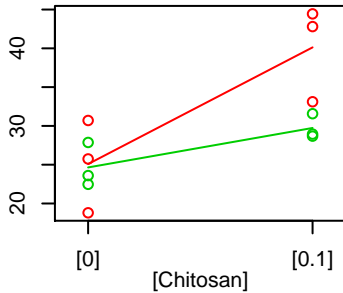**RZR68721.1**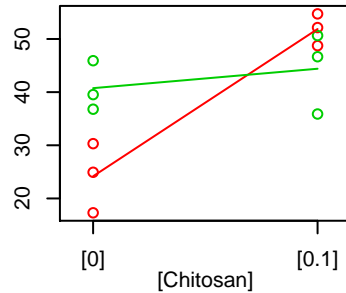**RZR60922.1**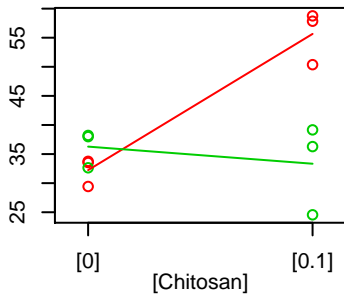**RZR61136.1**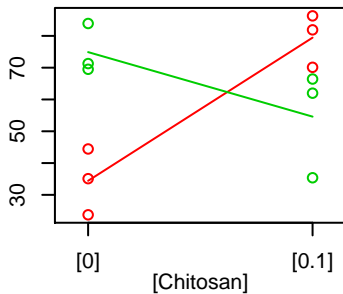**RZR61142.1**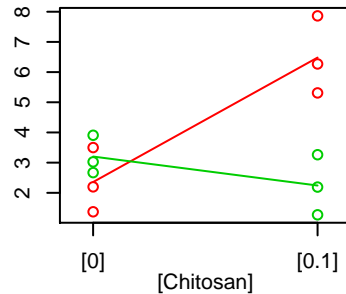**RZR64079.1**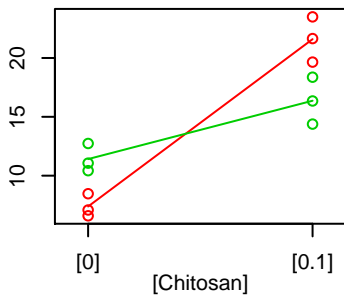**RZR59485.1**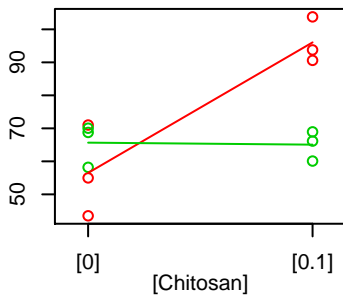**RZR66821.1**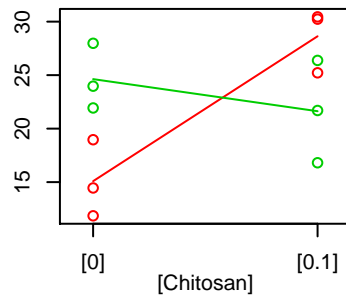

**RZR59927.1**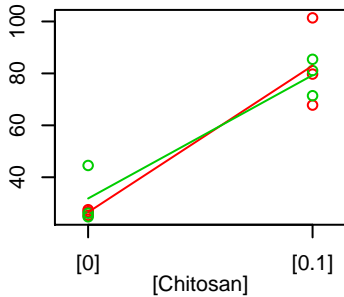**RZR68751.1**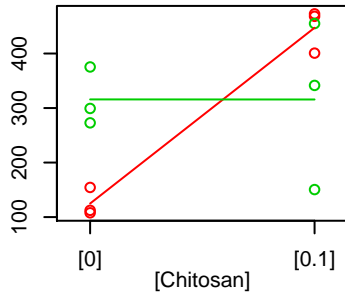**RZR68738.1**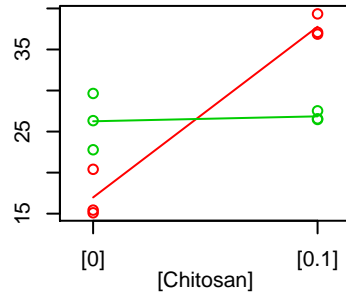**RZR63227.1**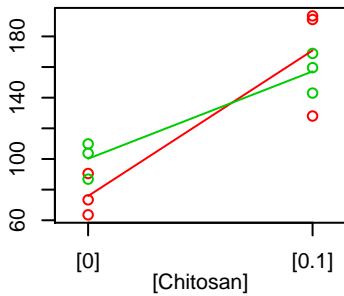**RZR69874.1**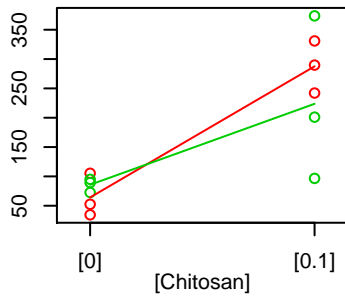**RZR69865.1**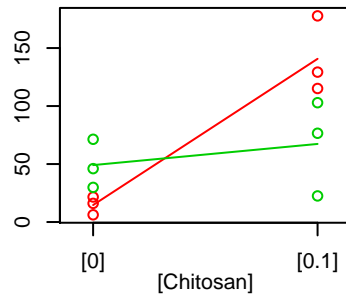**RZR64639.1**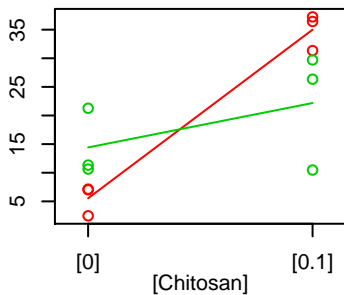**RZR61829.1**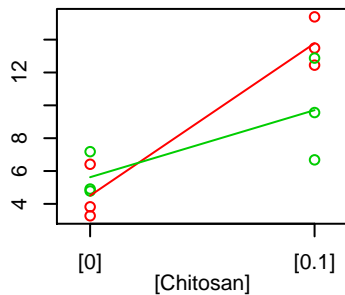**RZR69156.1**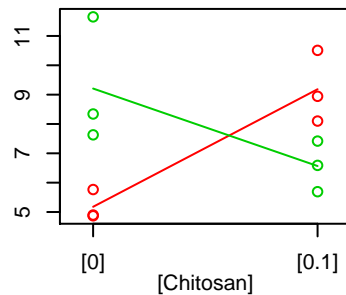

Supplement: EMI-23-4980-s006.pdf [file EMI-23-4980-s006.pdf]
